# Supplementary material for: One-pot synthesis of furocoumarins via sequential Pd/Cu-catalyzed alkynylation and intramolecular hydroalkoxylation
Source: Royal Society of Chemistry journal article supplement (doi:10.1039/c004233a), 2010-01-01

Supplementary Information for:

# **One-Pot Synthesis of Furocoumarins *via* Sequential Pd/Cu-Catalyzed Alkynylation and Intramolecular Hydroalkoxylation**

Lei Chen, Yi Li and Ming-Hua Xu\*

*State key Laboratory of Drug Research, Shanghai Institute of Materia Medica, Chinese Academy  
of Sciences, 555 Zuchongzhi Road, Shanghai 201203, China*

## **Table of Contents**

|                                                                                                             |              |
|-------------------------------------------------------------------------------------------------------------|--------------|
| <b>Copies of <math>^1\text{H}</math> and <math>^{13}\text{C}</math> NMR spectra of compounds 4a-d.....</b>  | <b>1-8</b>   |
| <b>Copies of <math>^1\text{H}</math> and <math>^{13}\text{C}</math> NMR spectra of compounds 1a-m .....</b> | <b>9-34</b>  |
| <b>Copies of <math>^1\text{H}</math> and <math>^{13}\text{C}</math> NMR spectra of compound 5 .....</b>     | <b>35-36</b> |

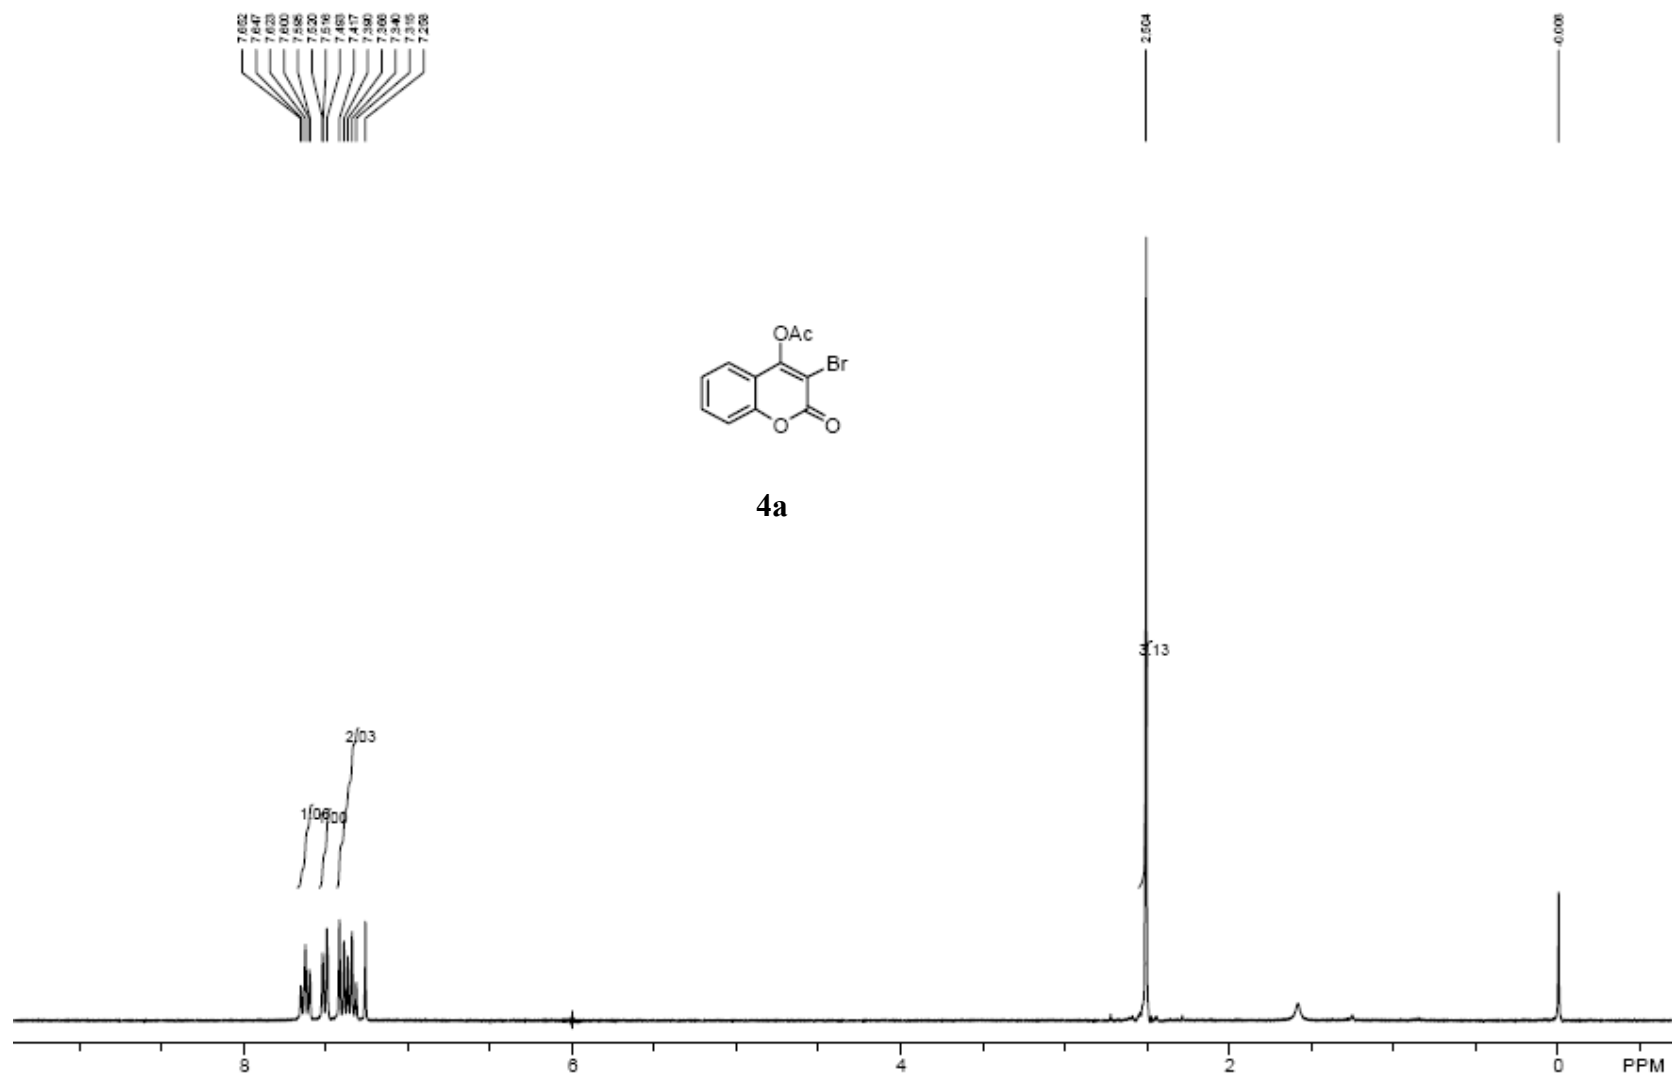

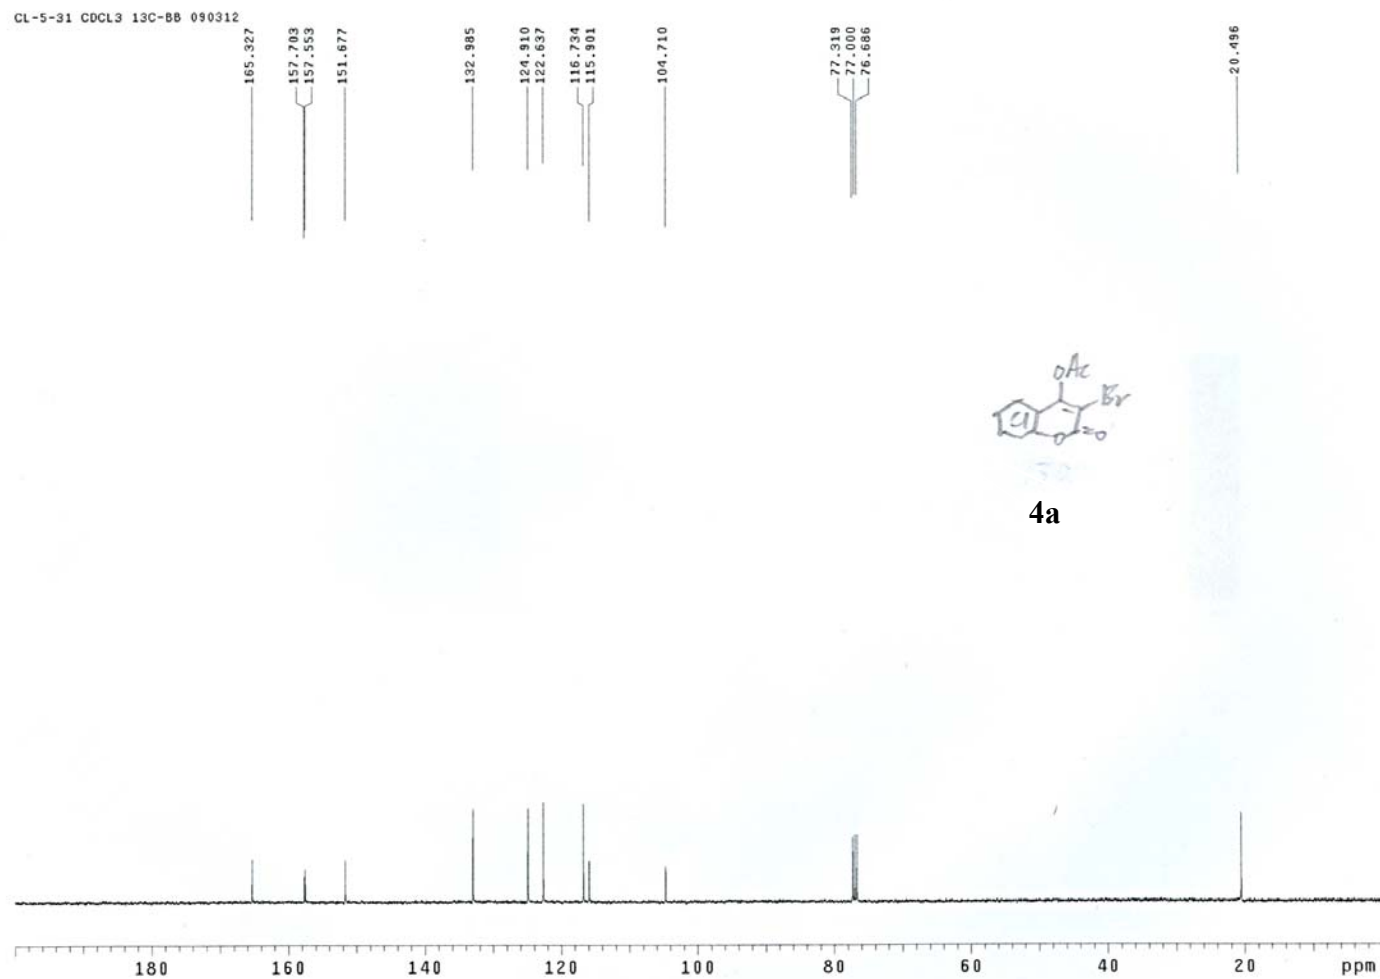

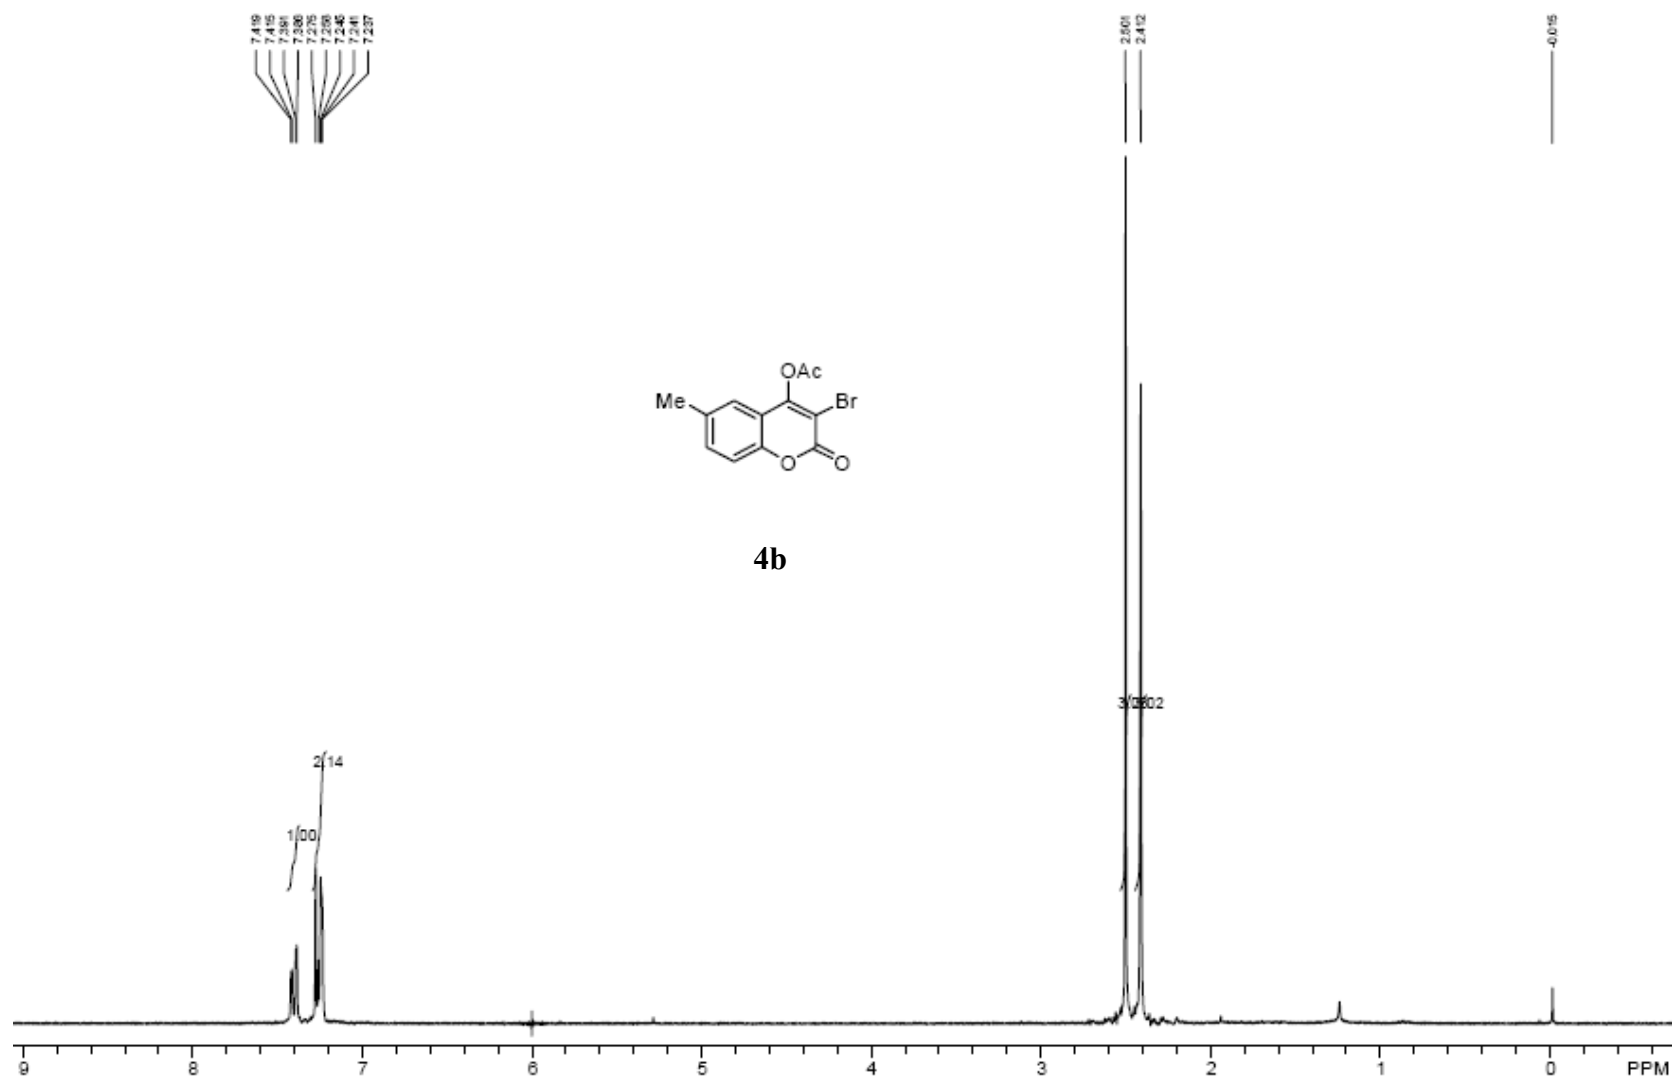

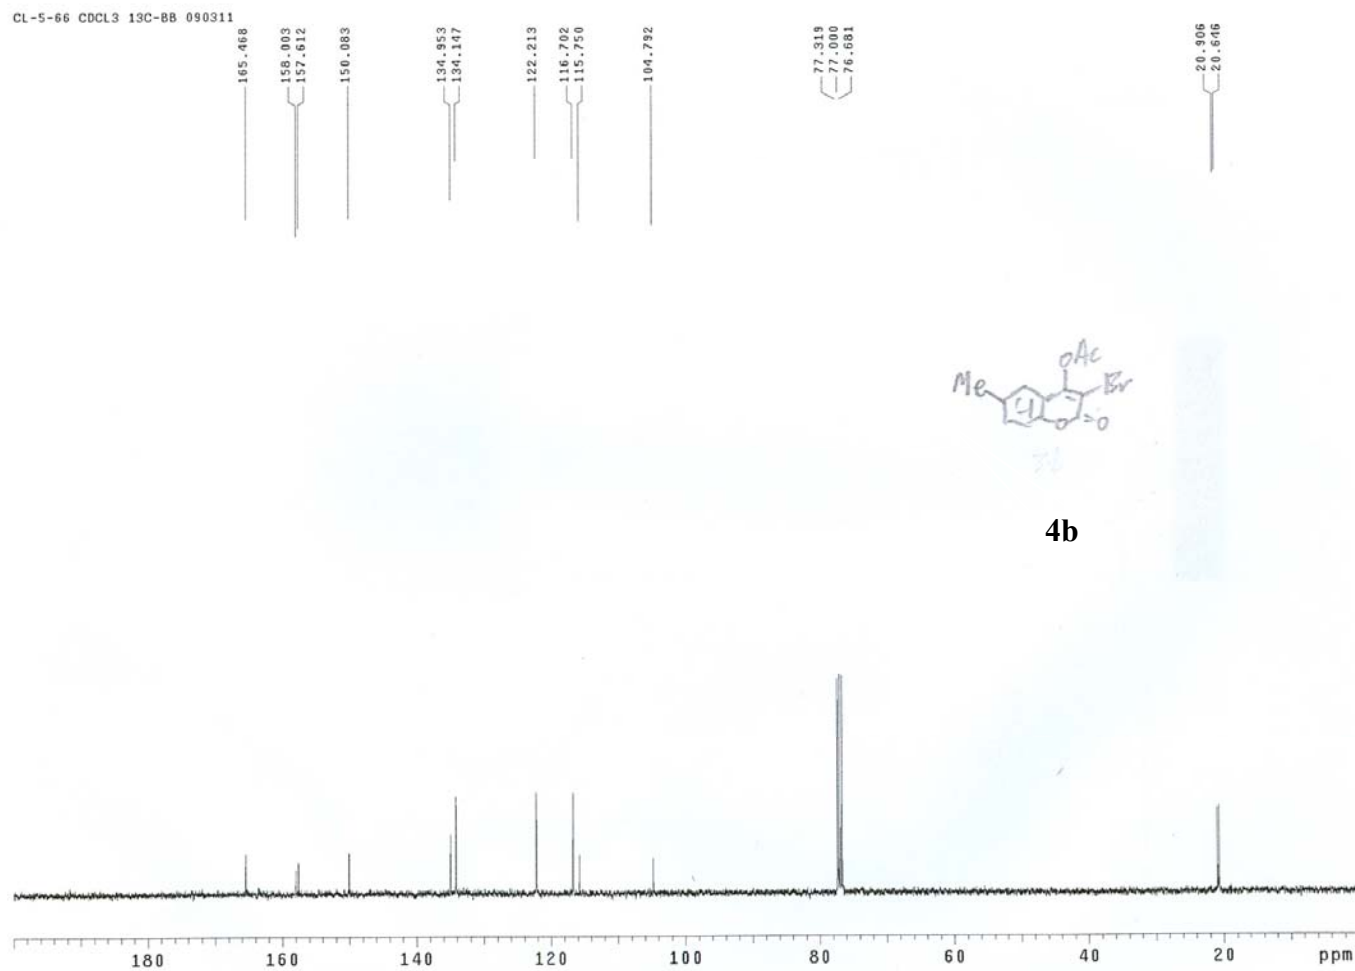

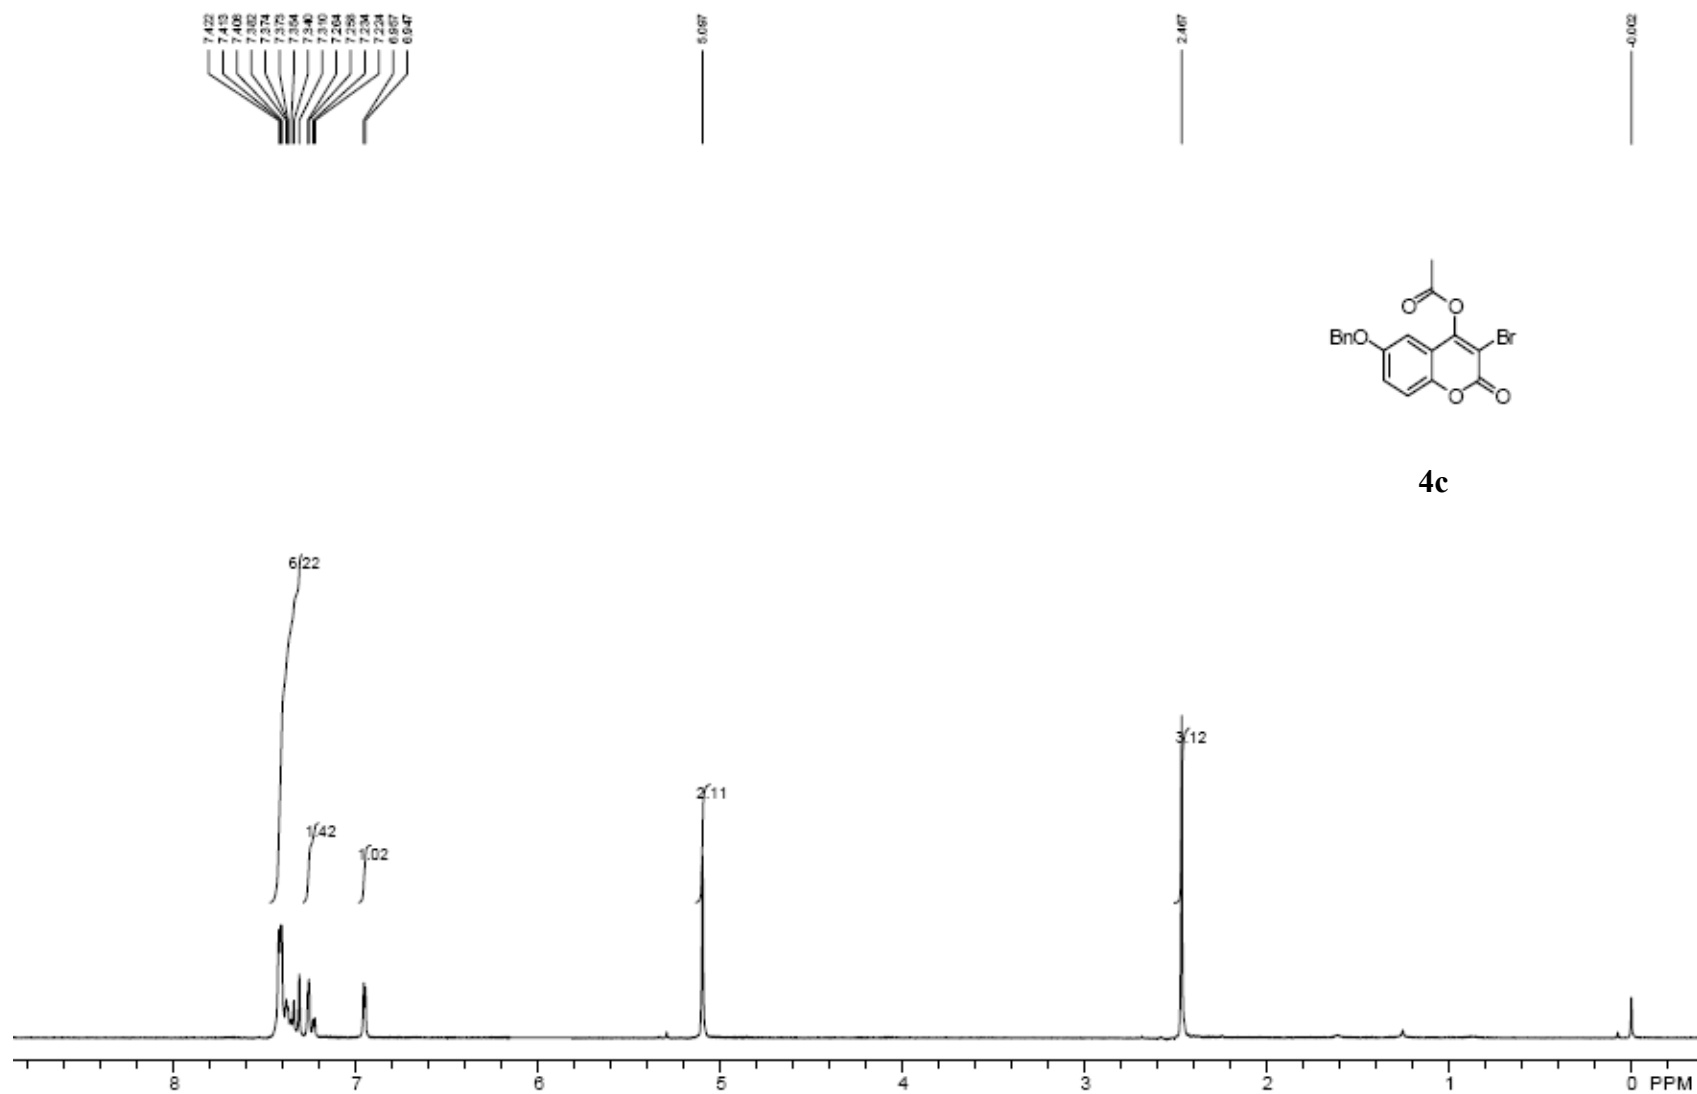

1589-151 CDCL3 BB+DEPT-135 Nov 17 2009

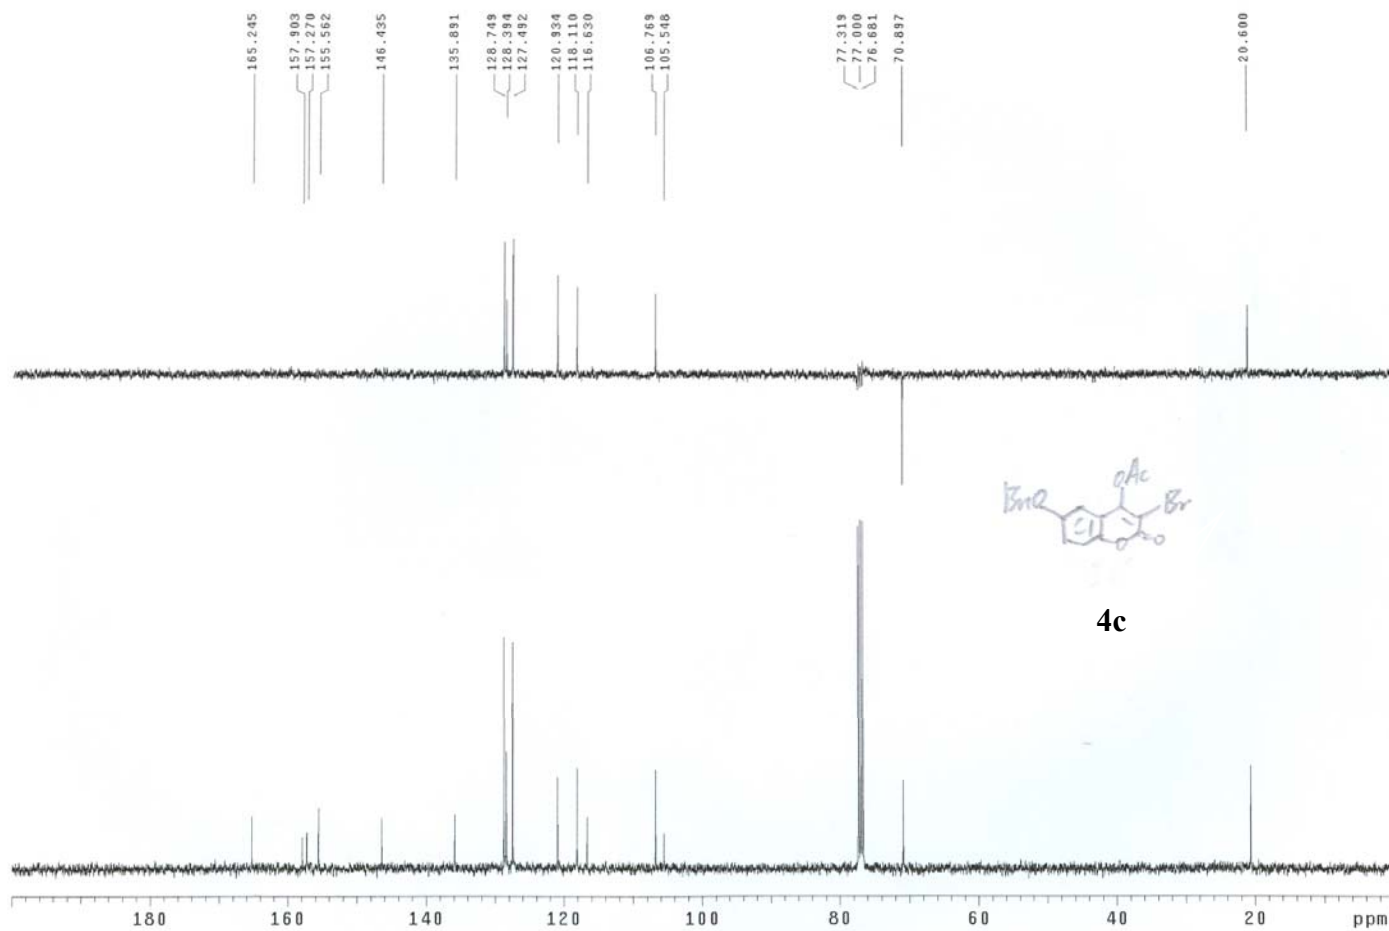

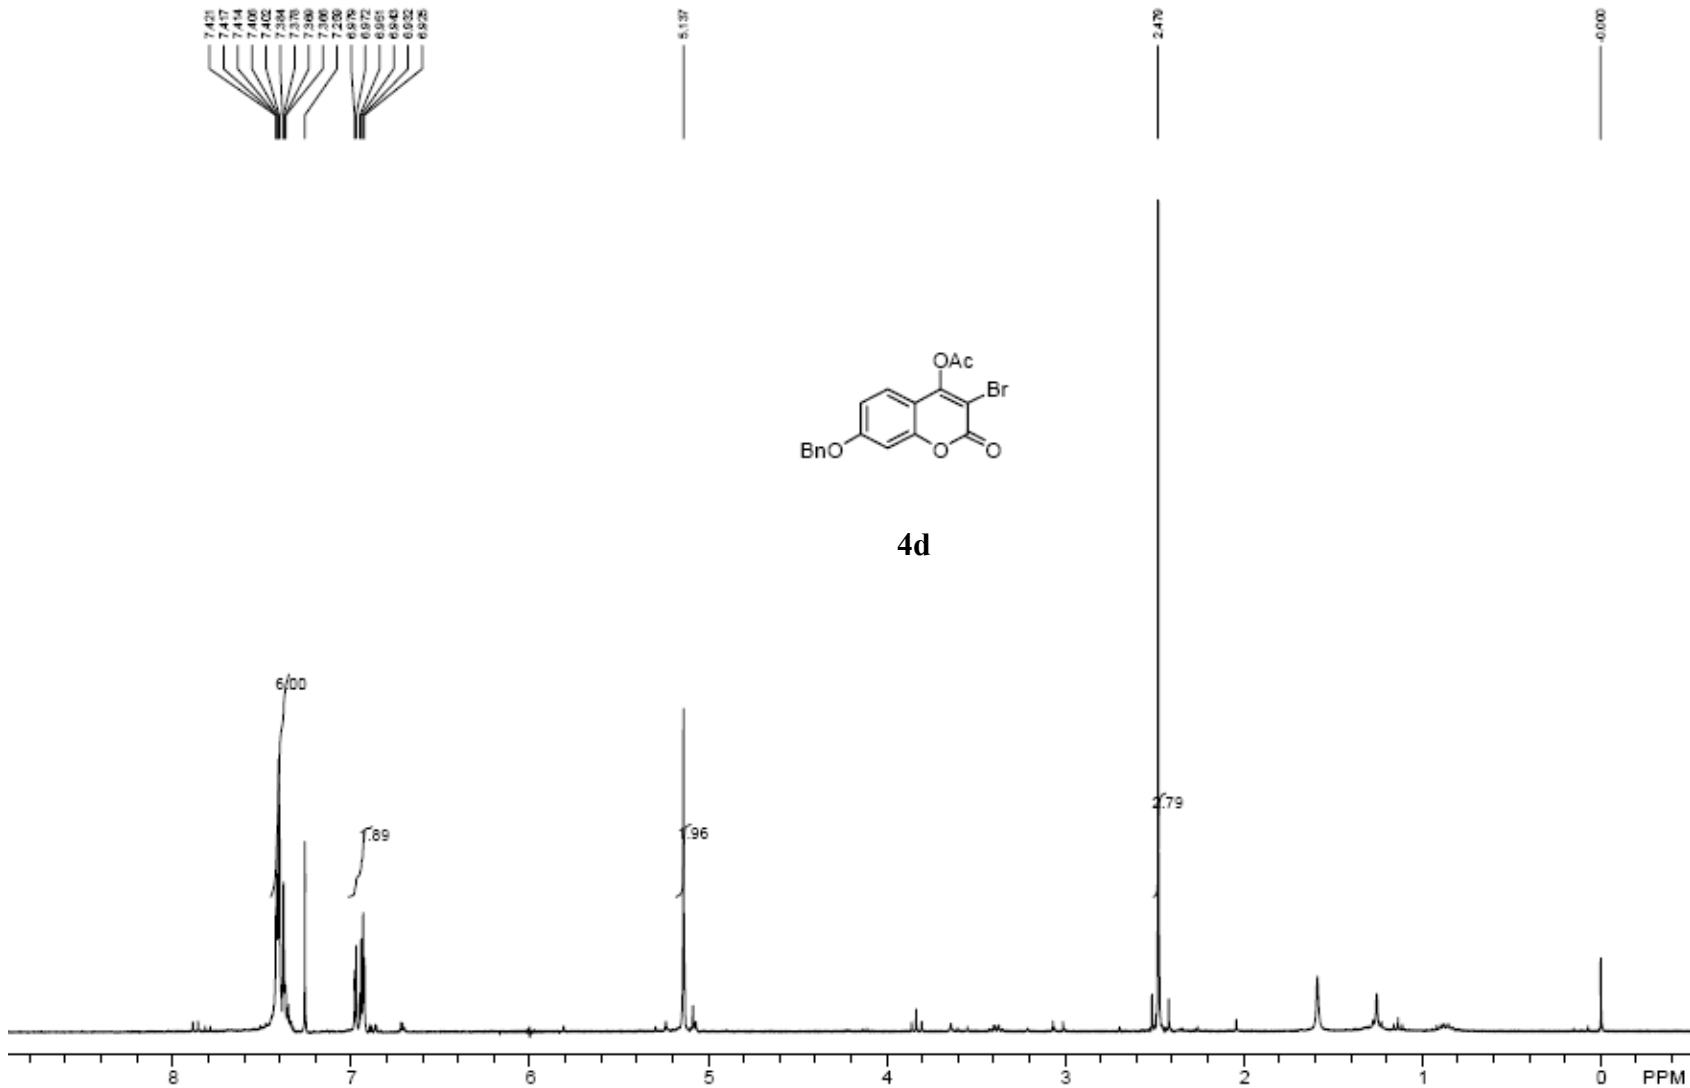

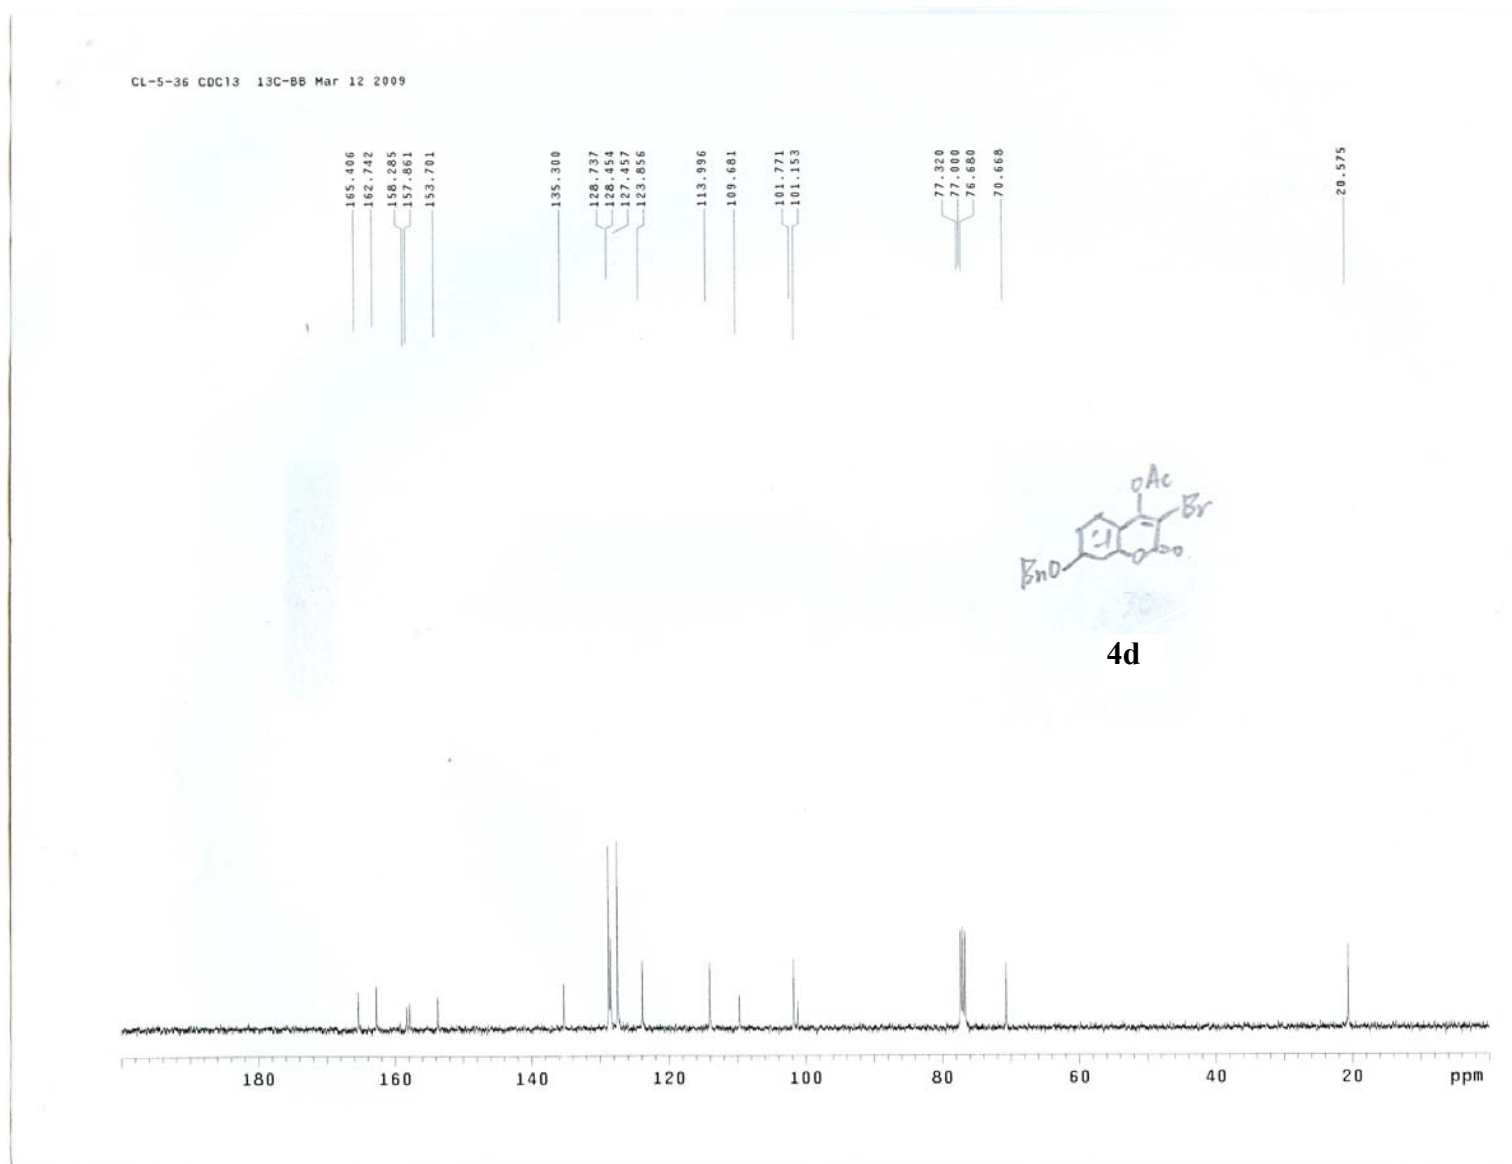

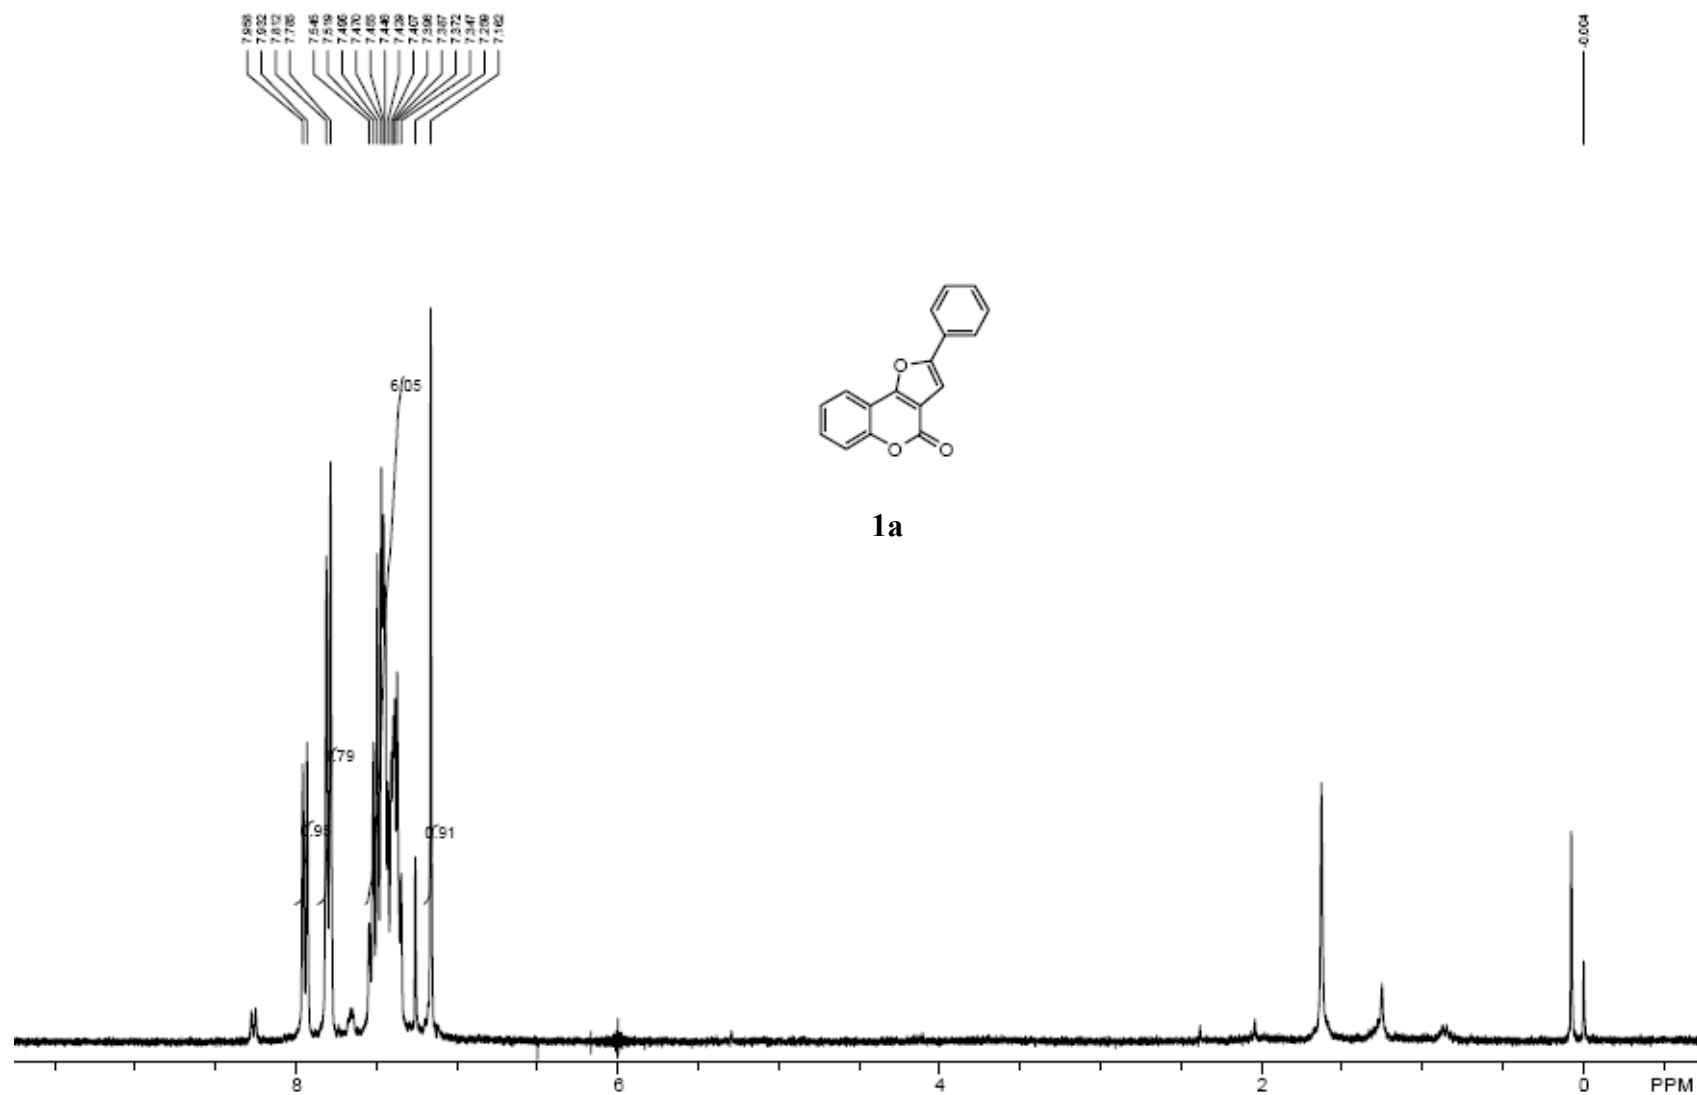

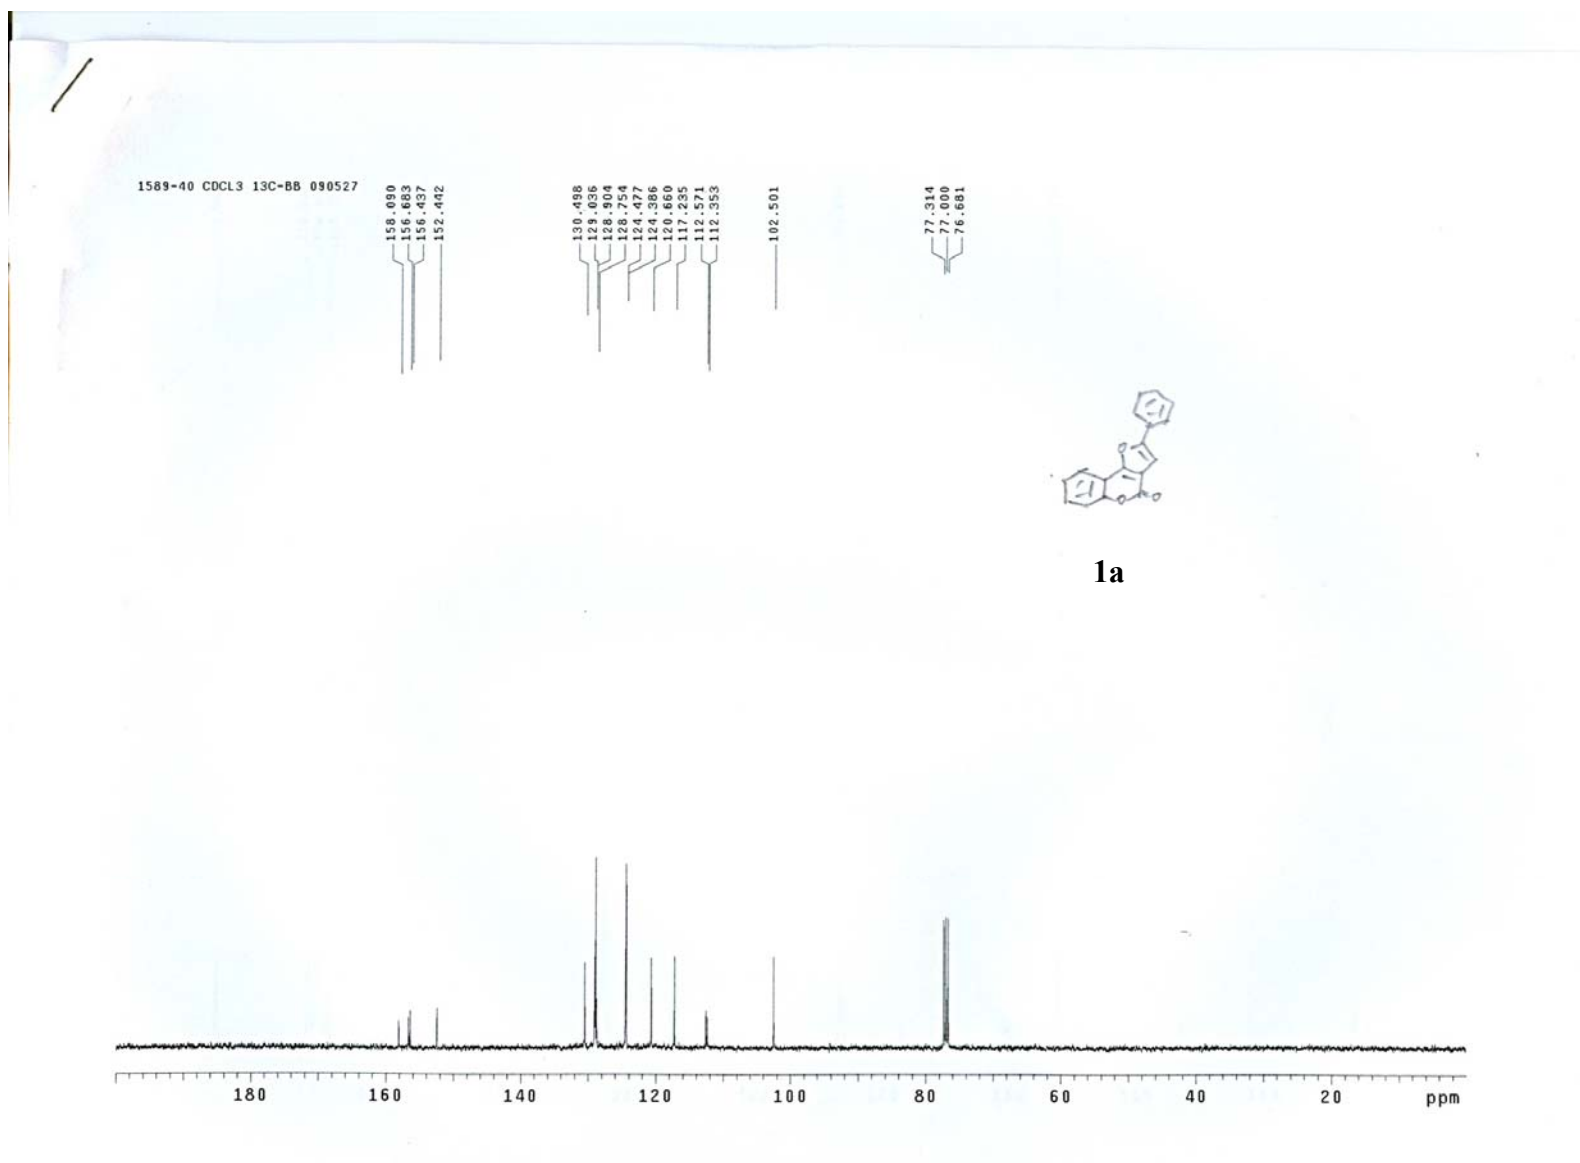

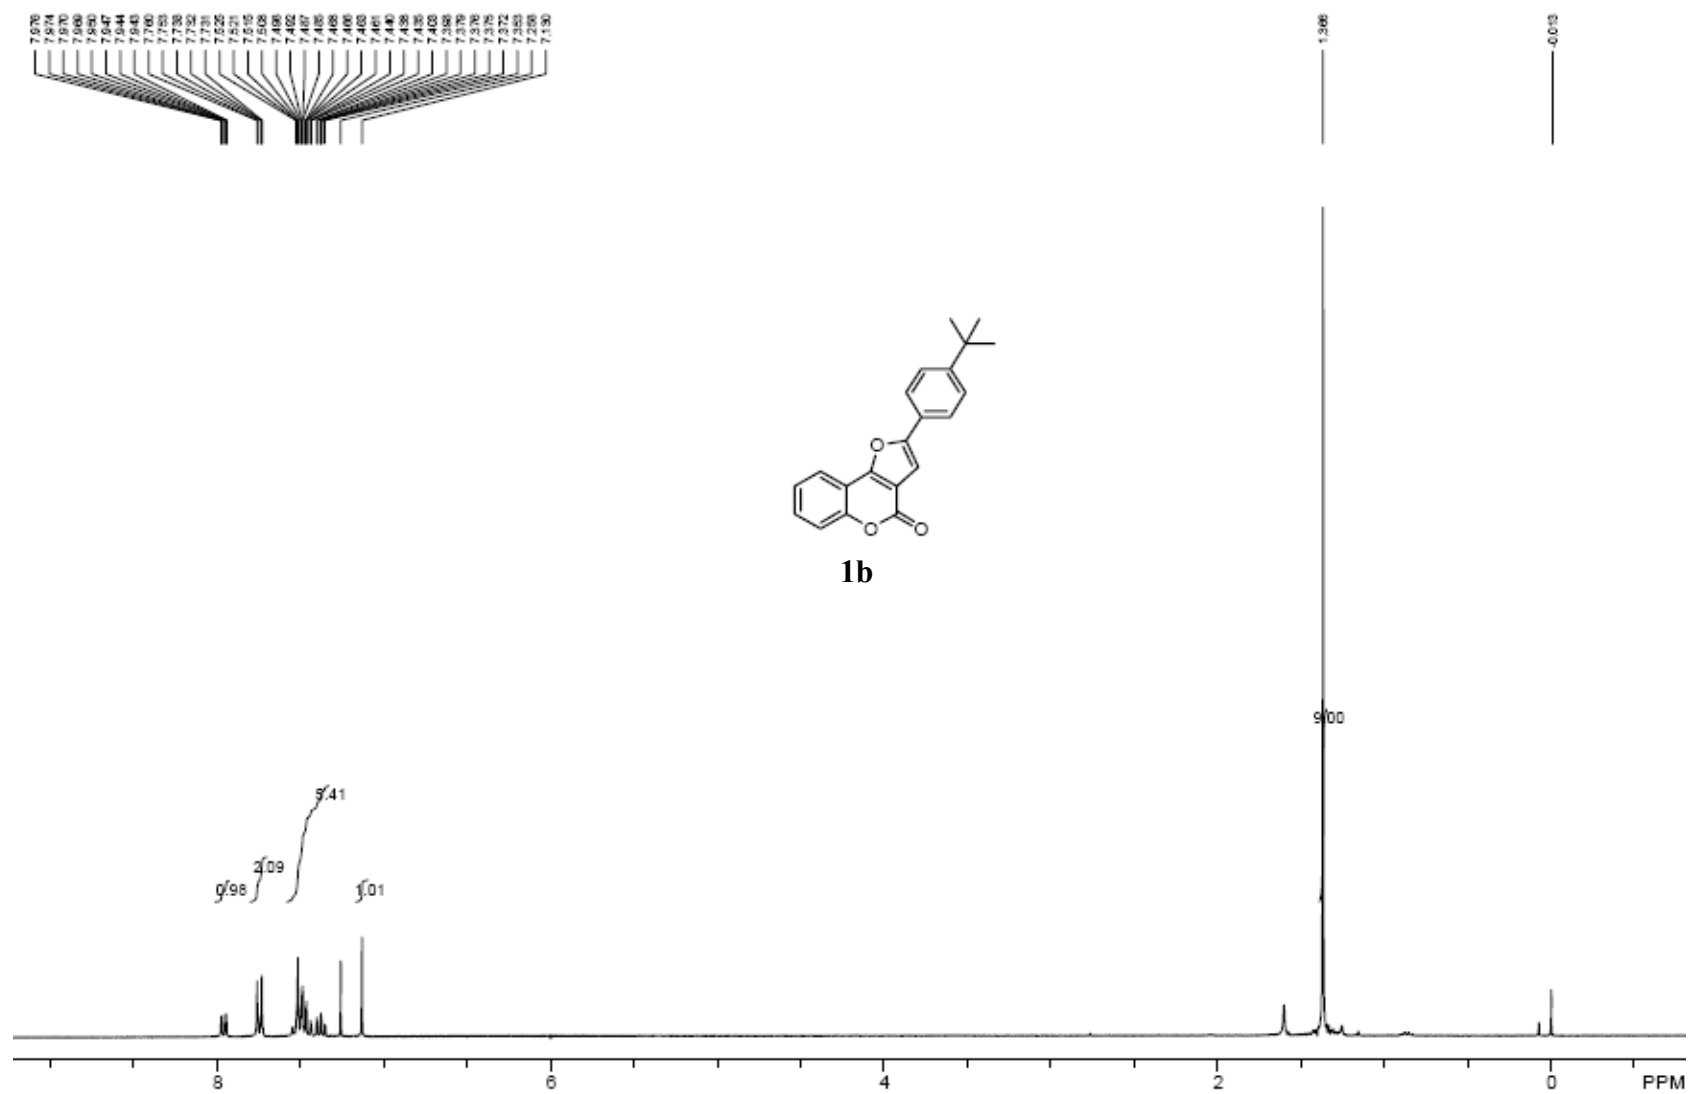

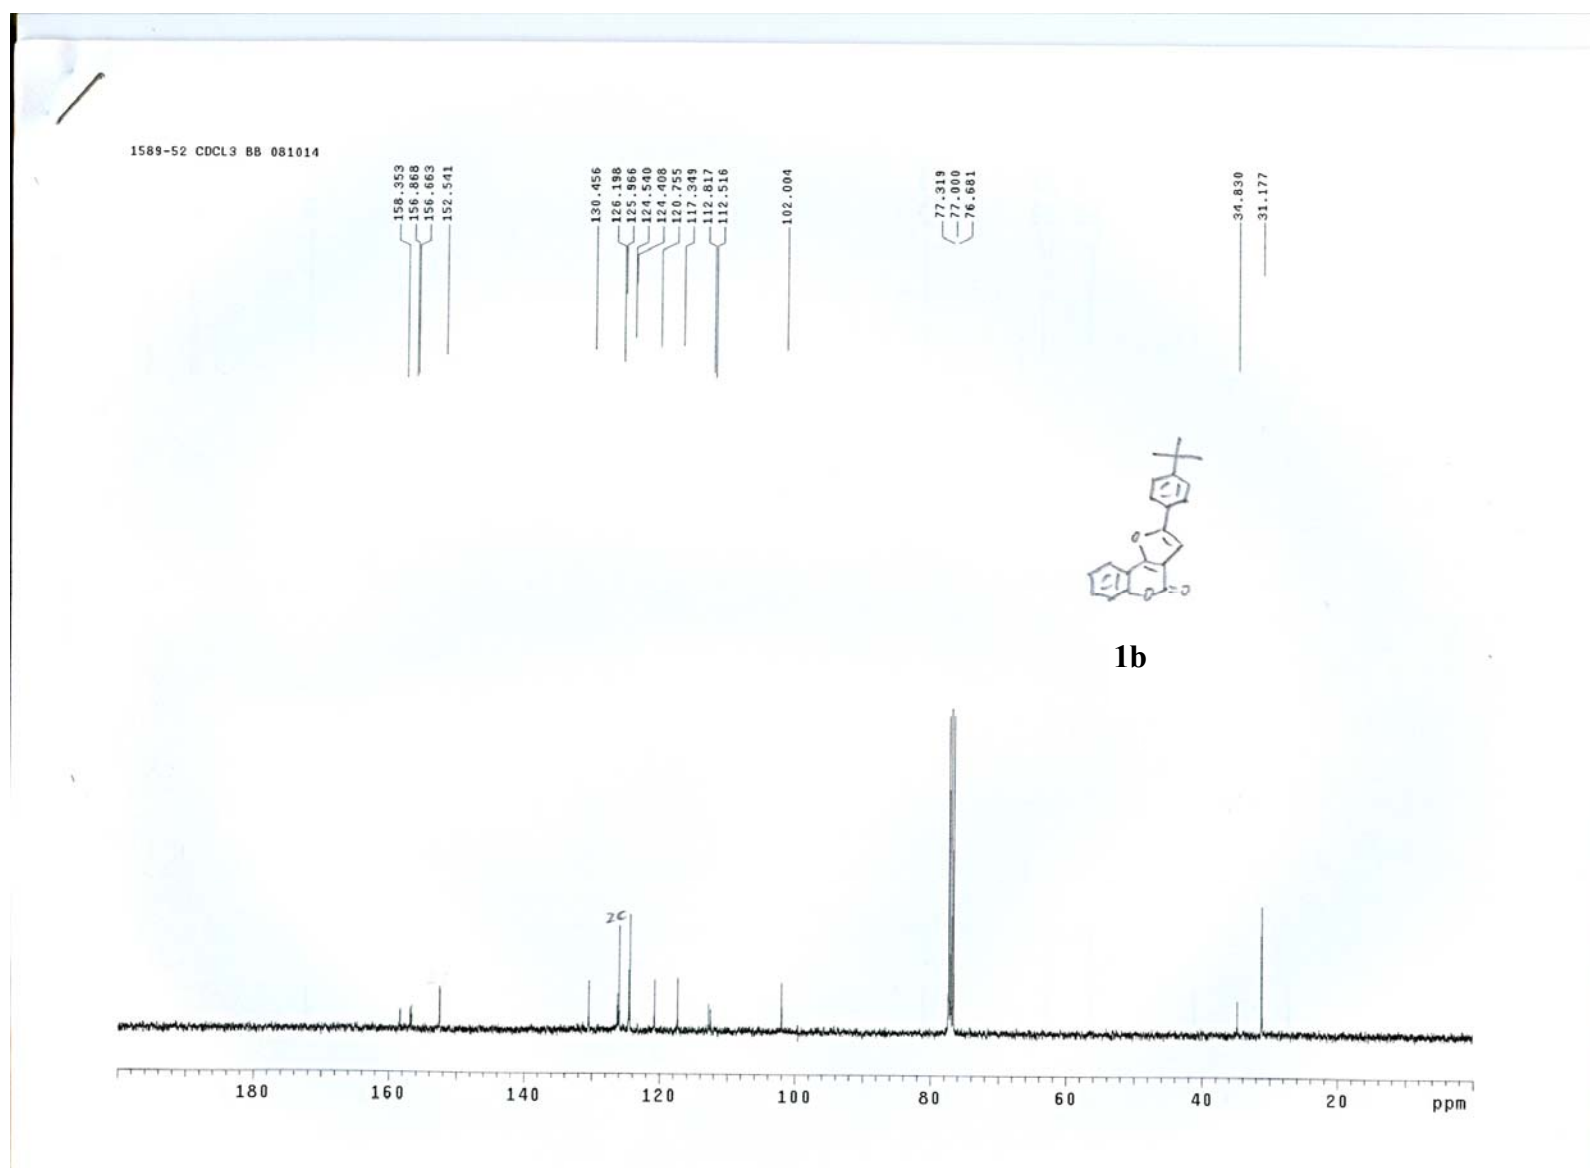

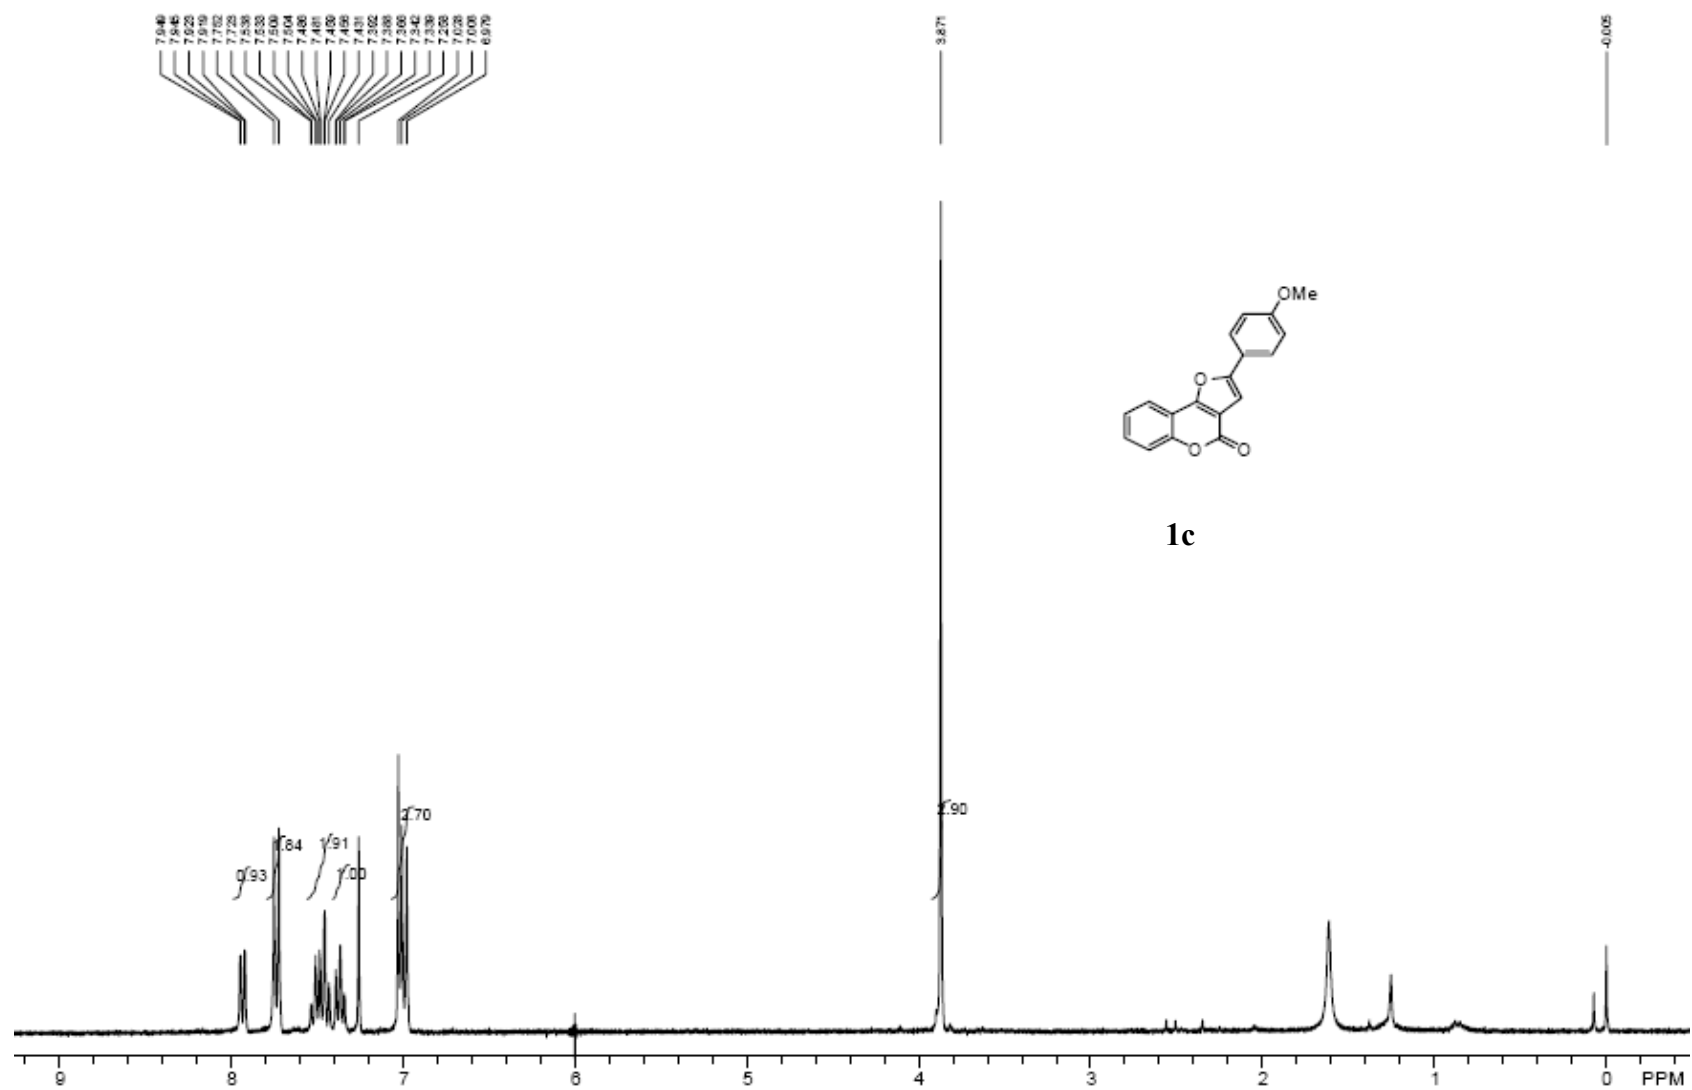

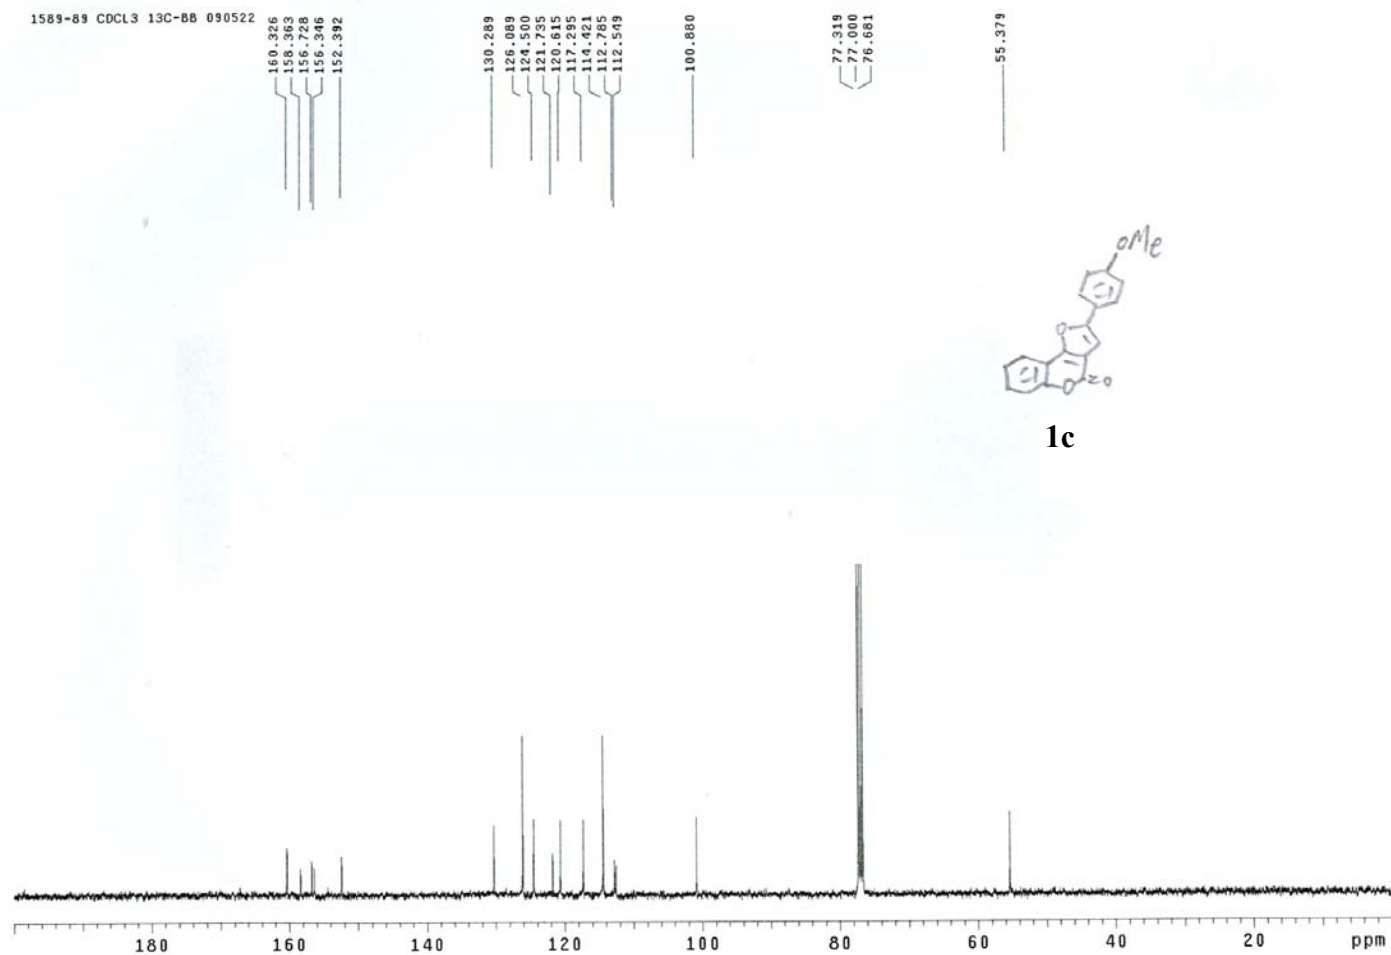

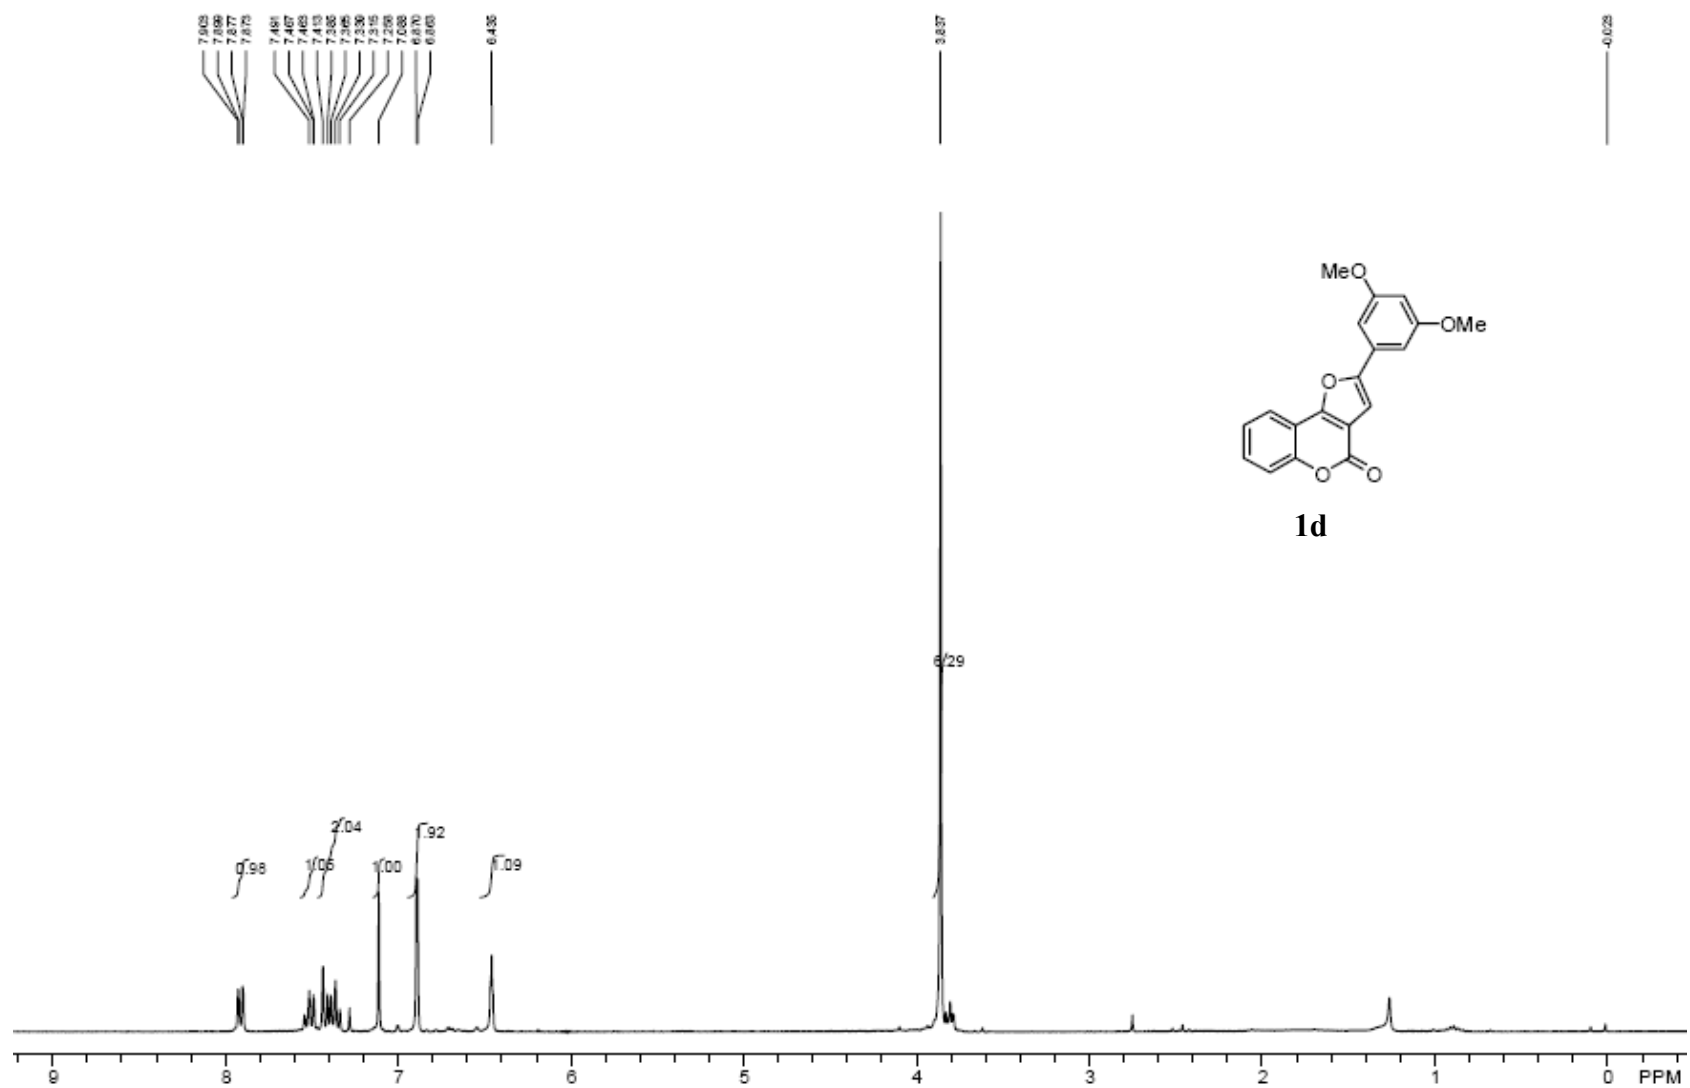

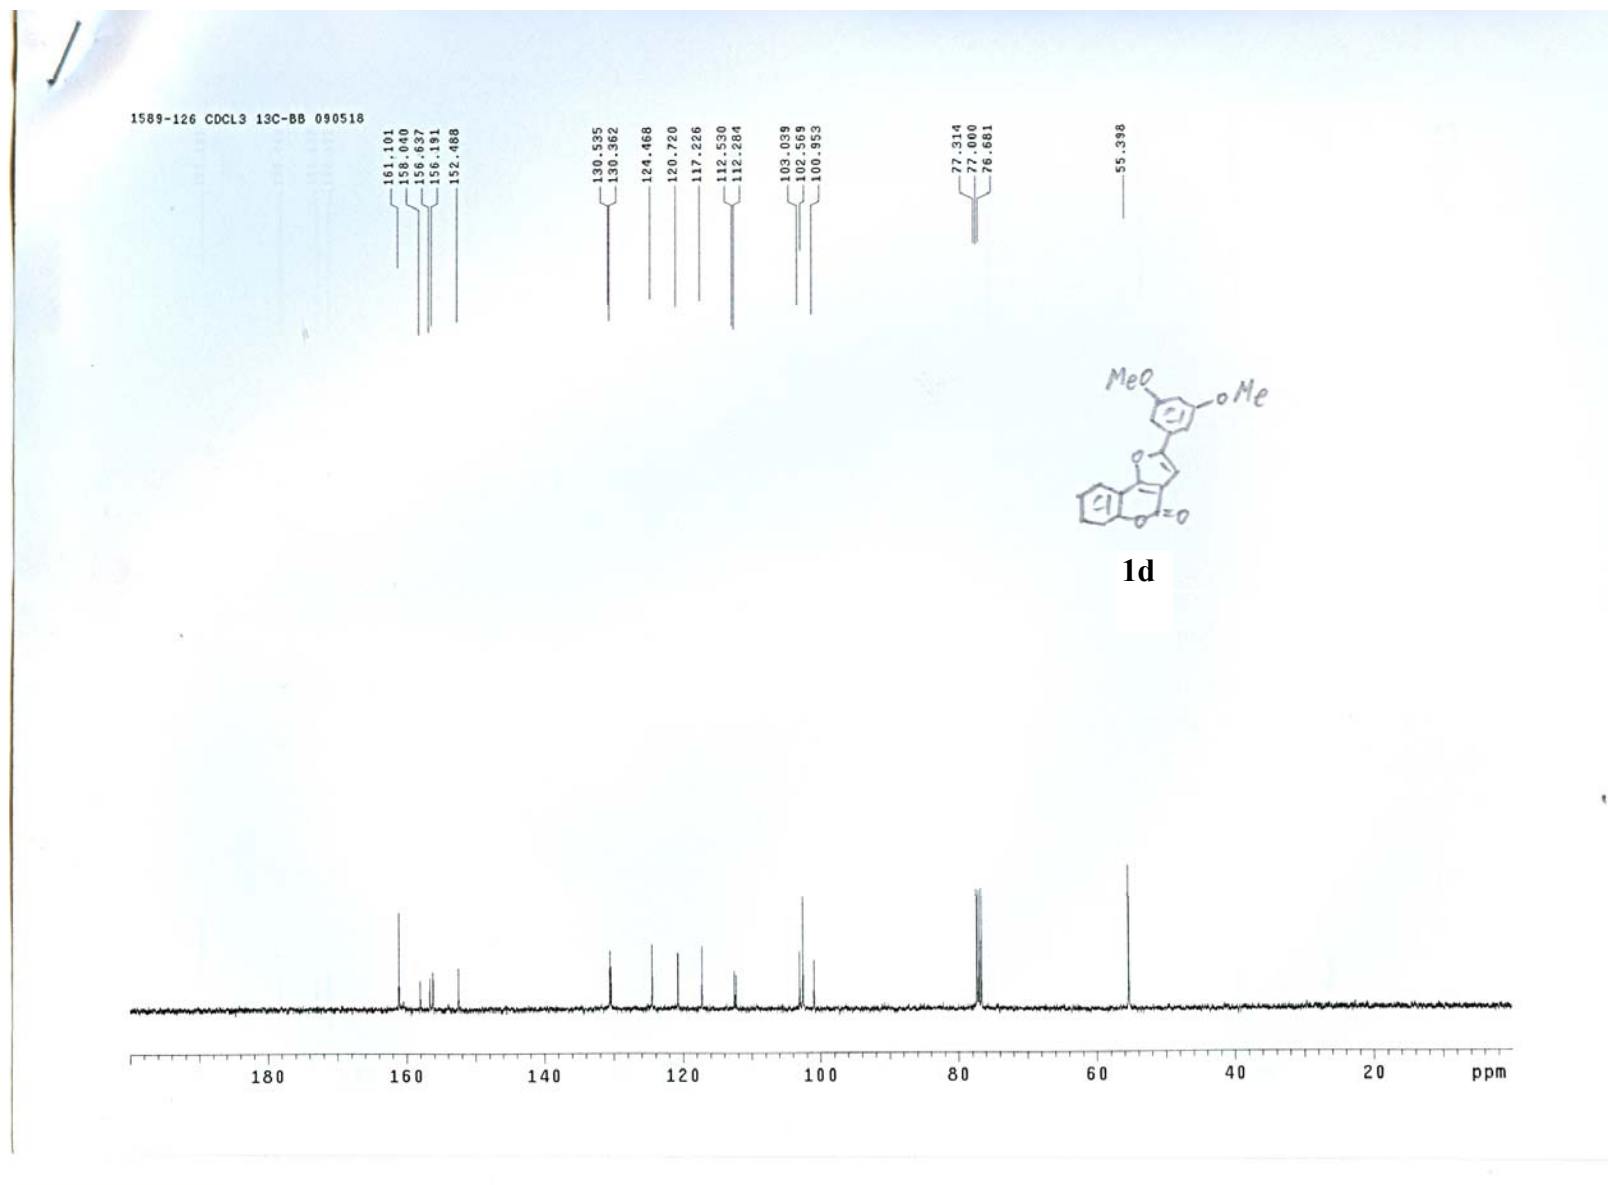

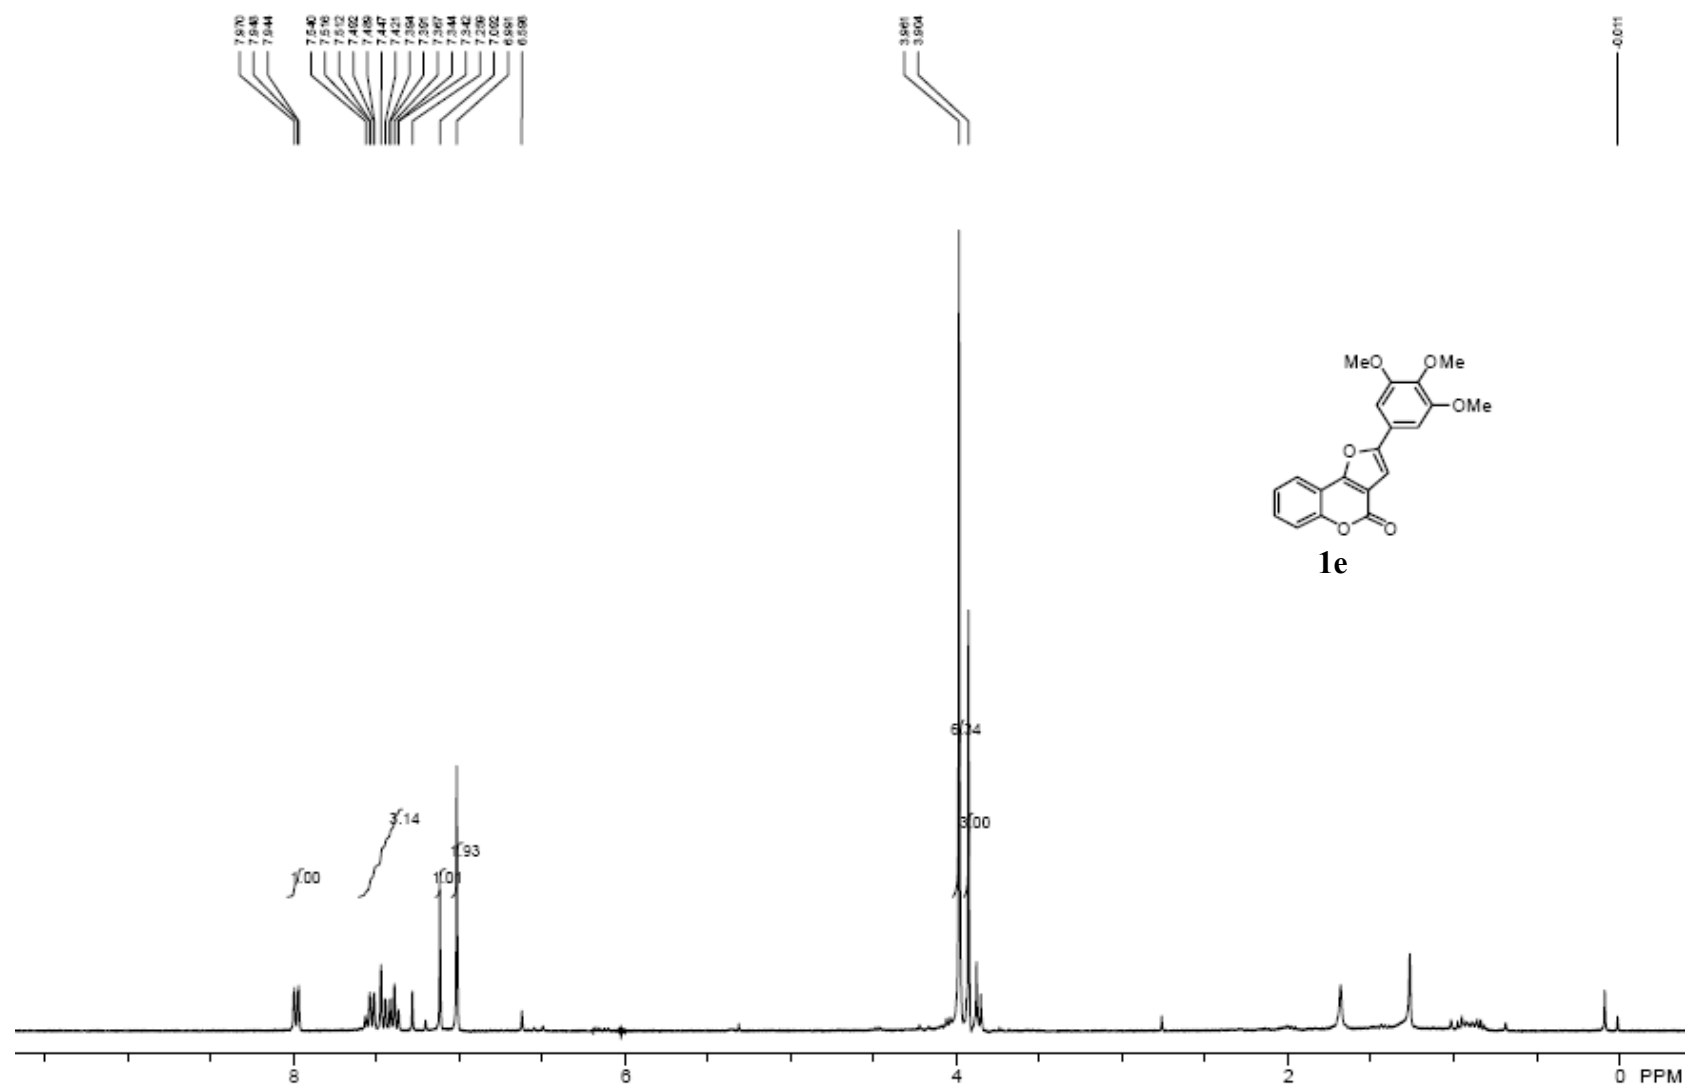

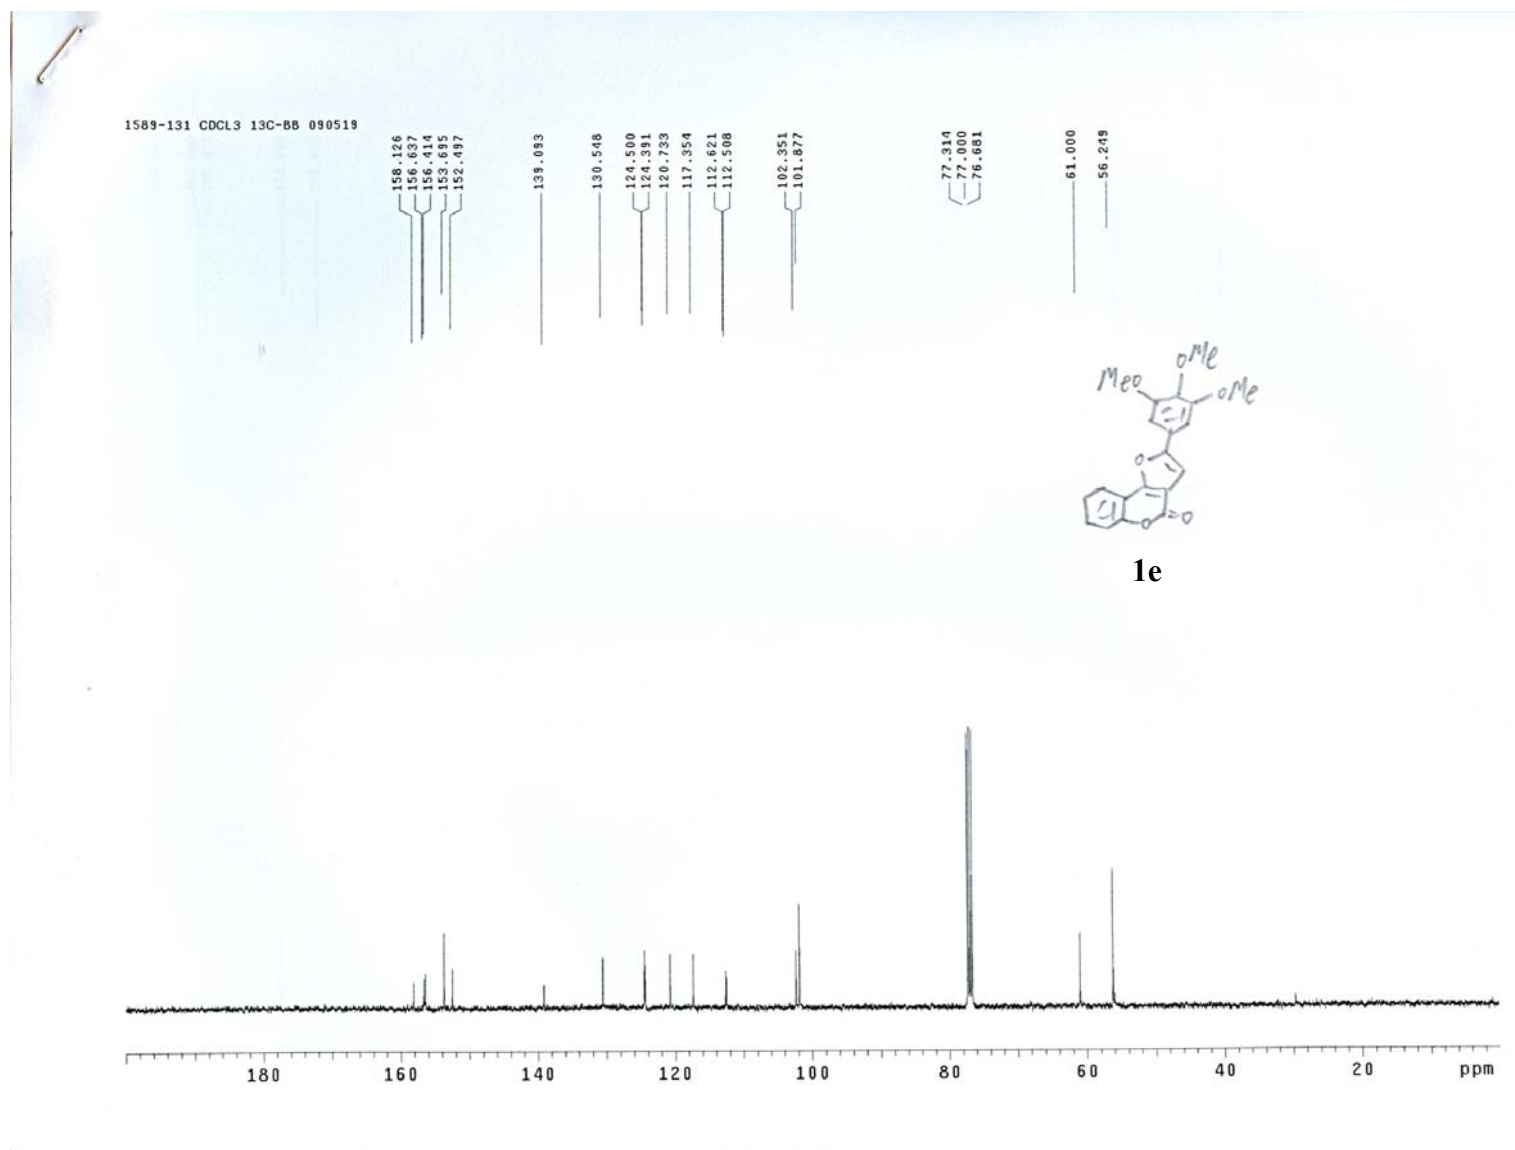

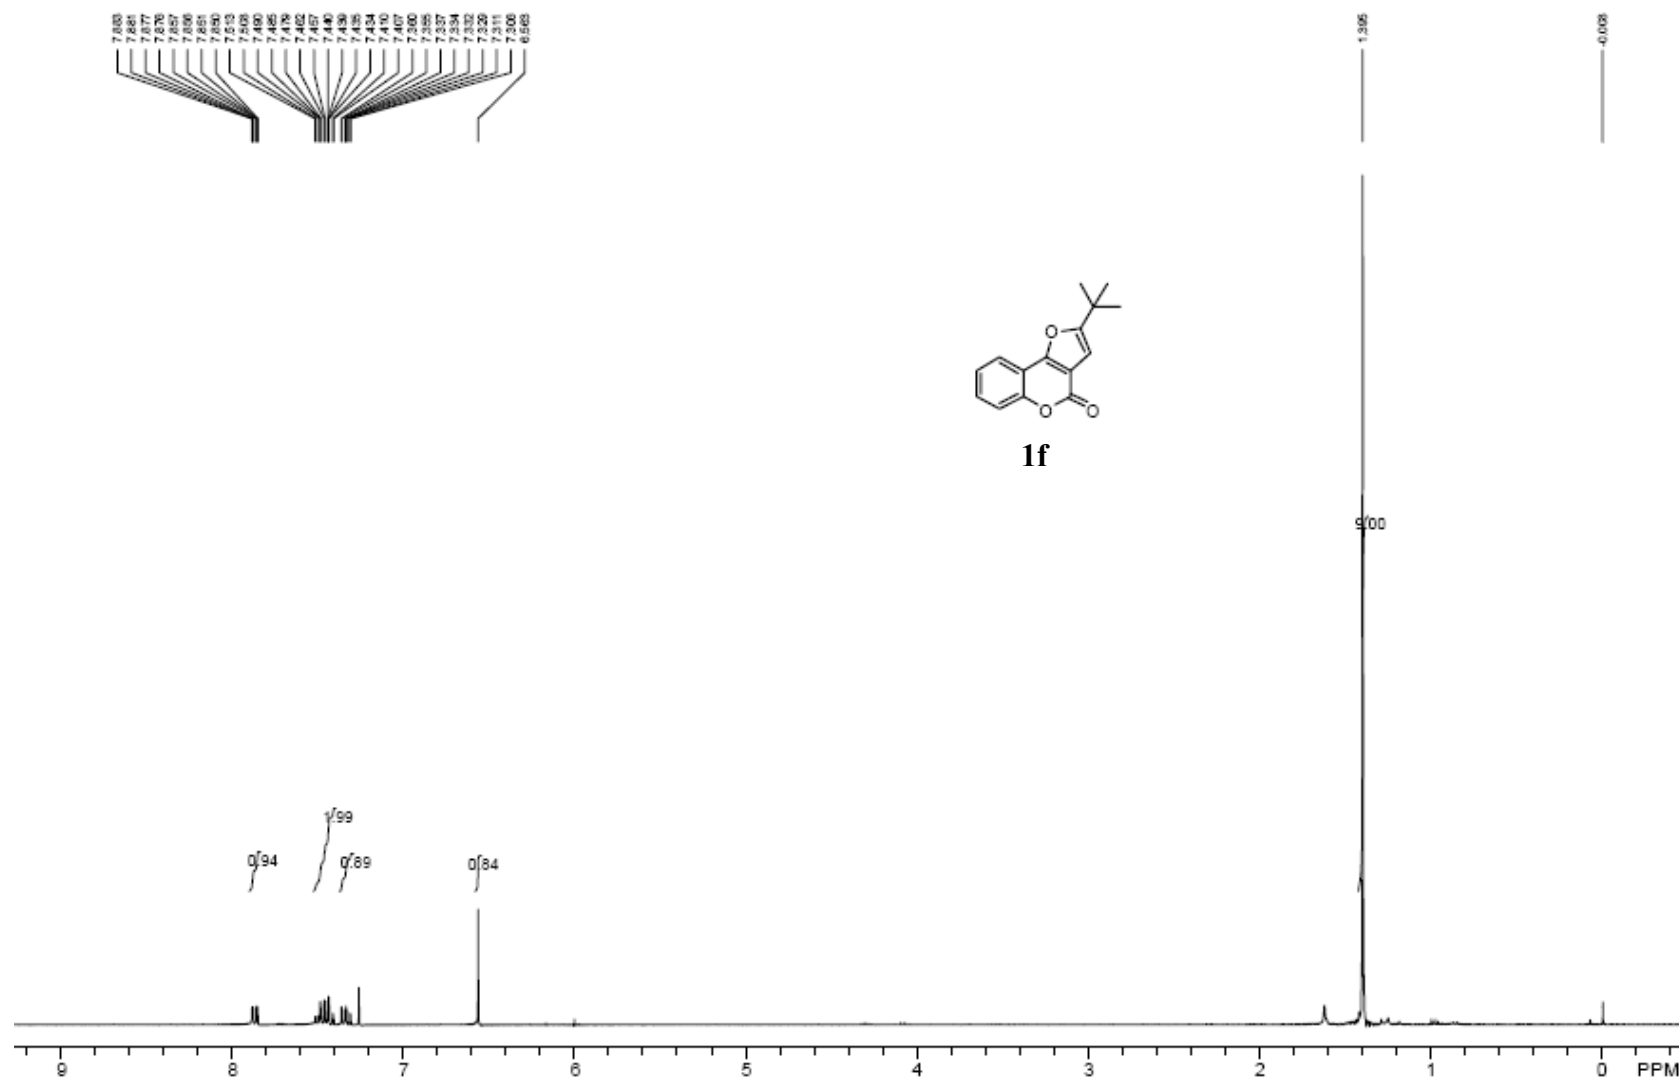

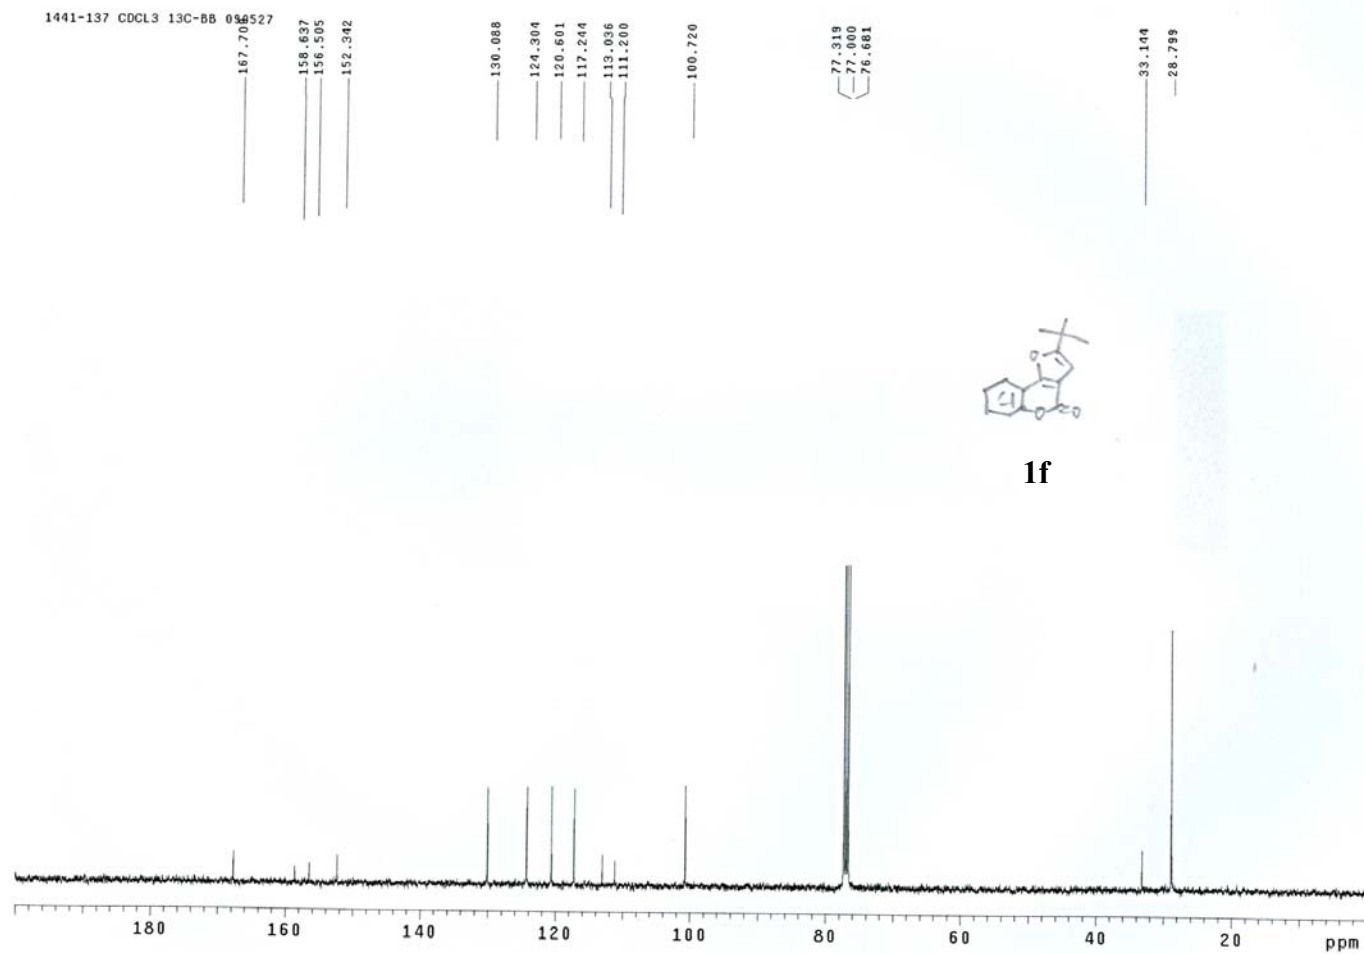

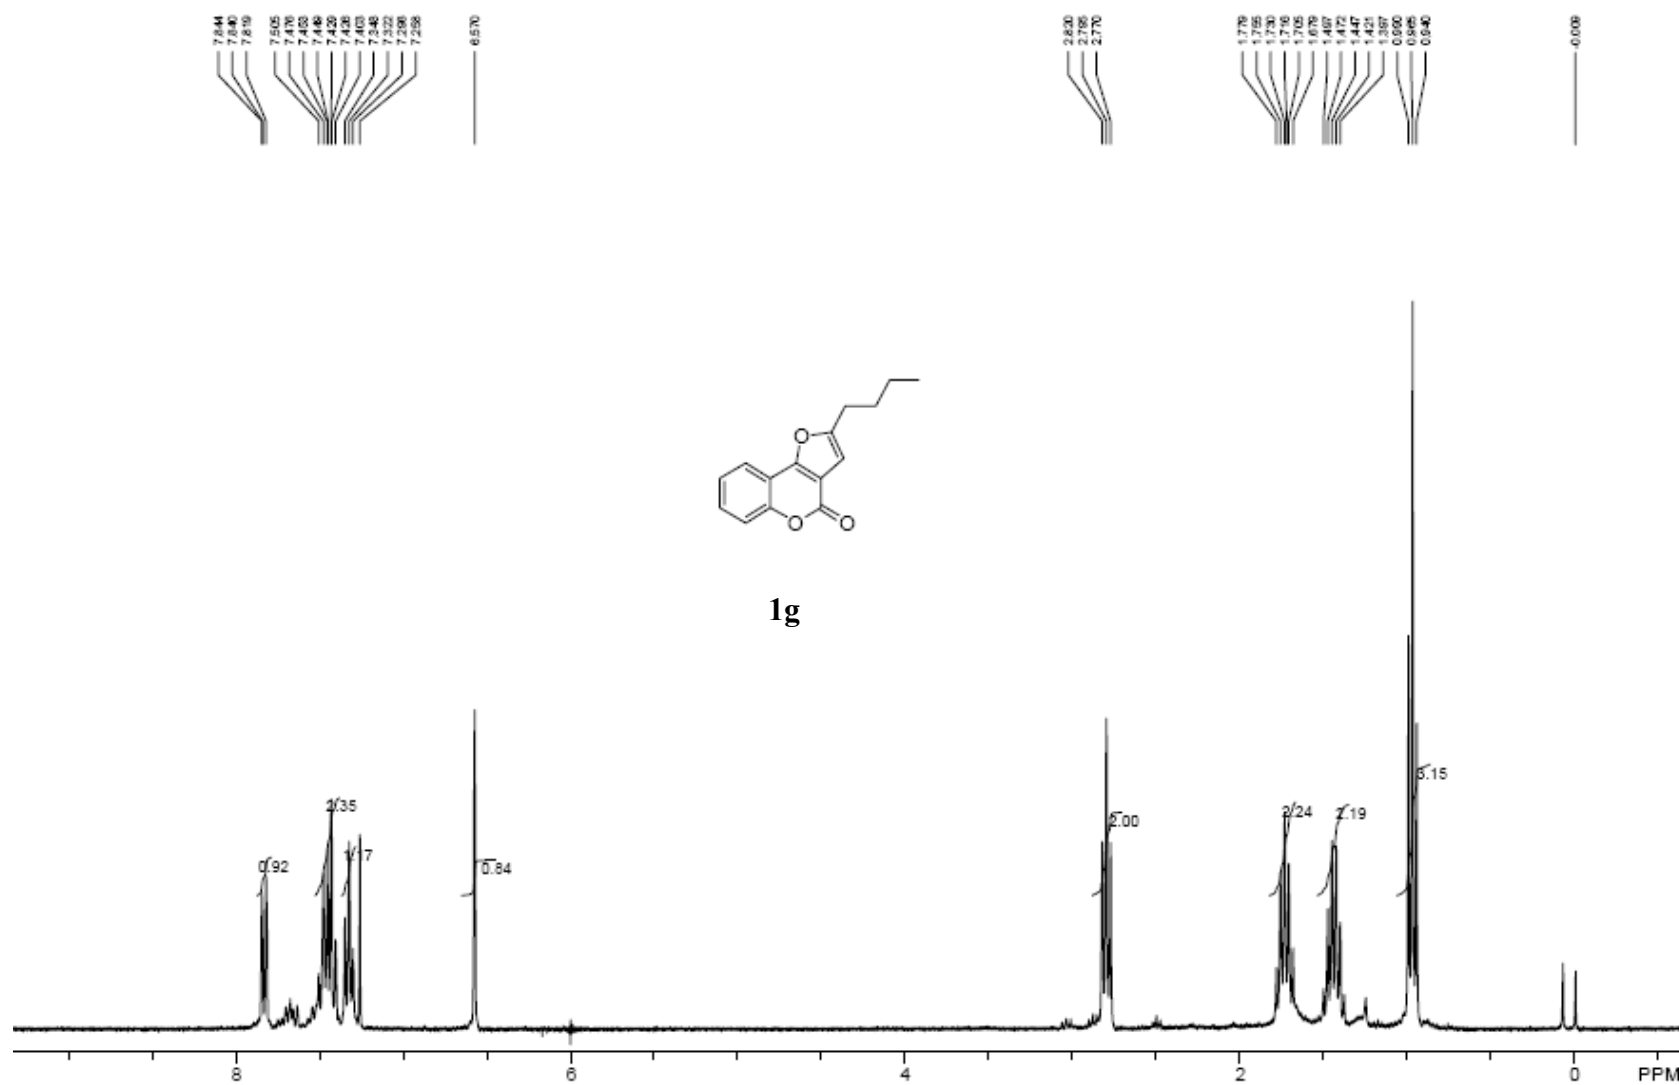

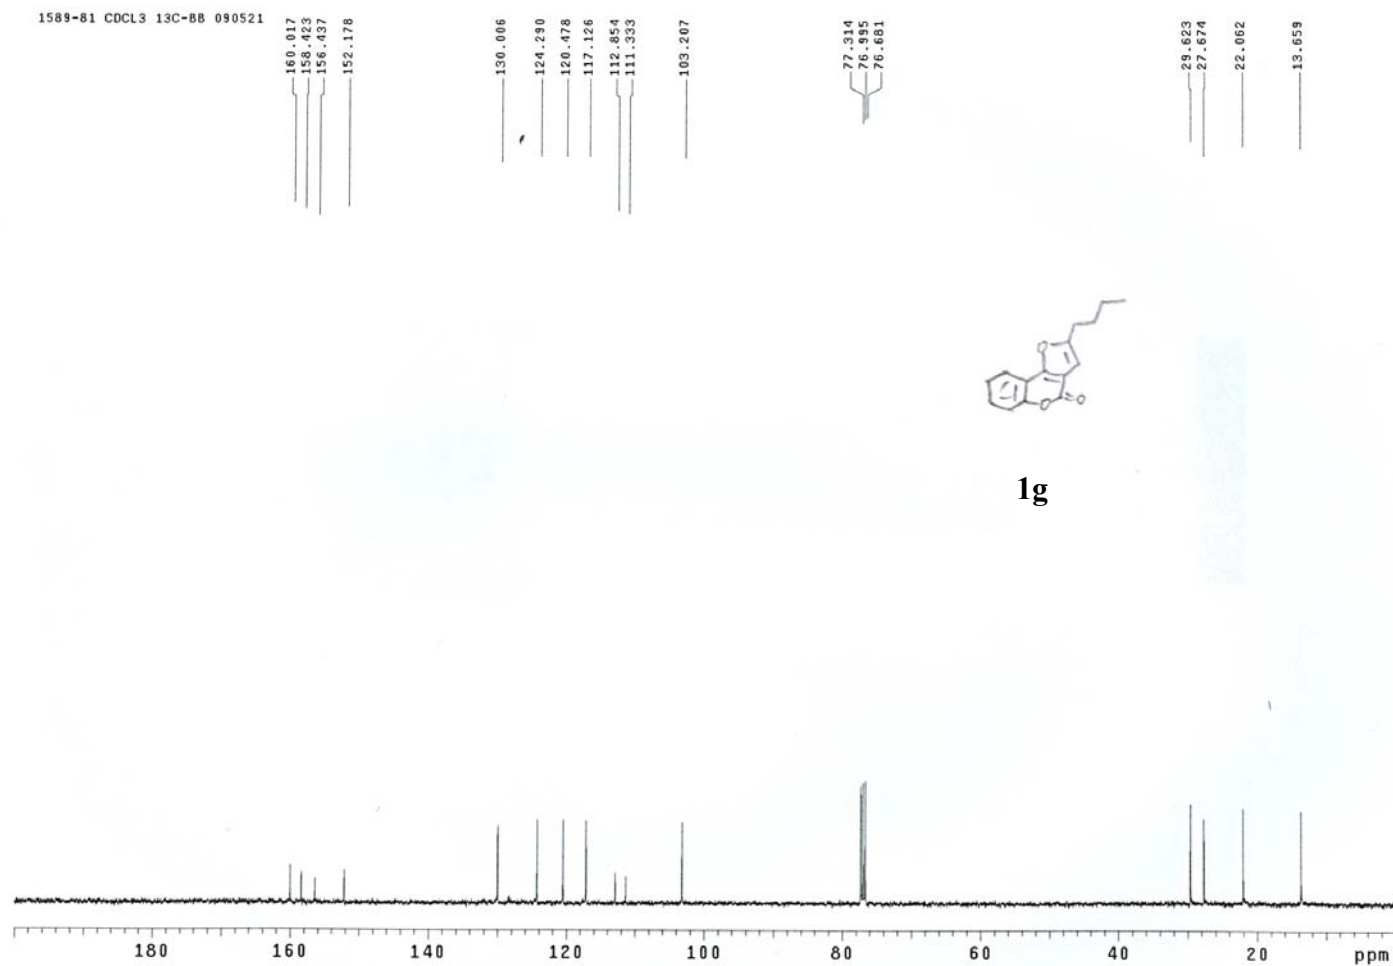

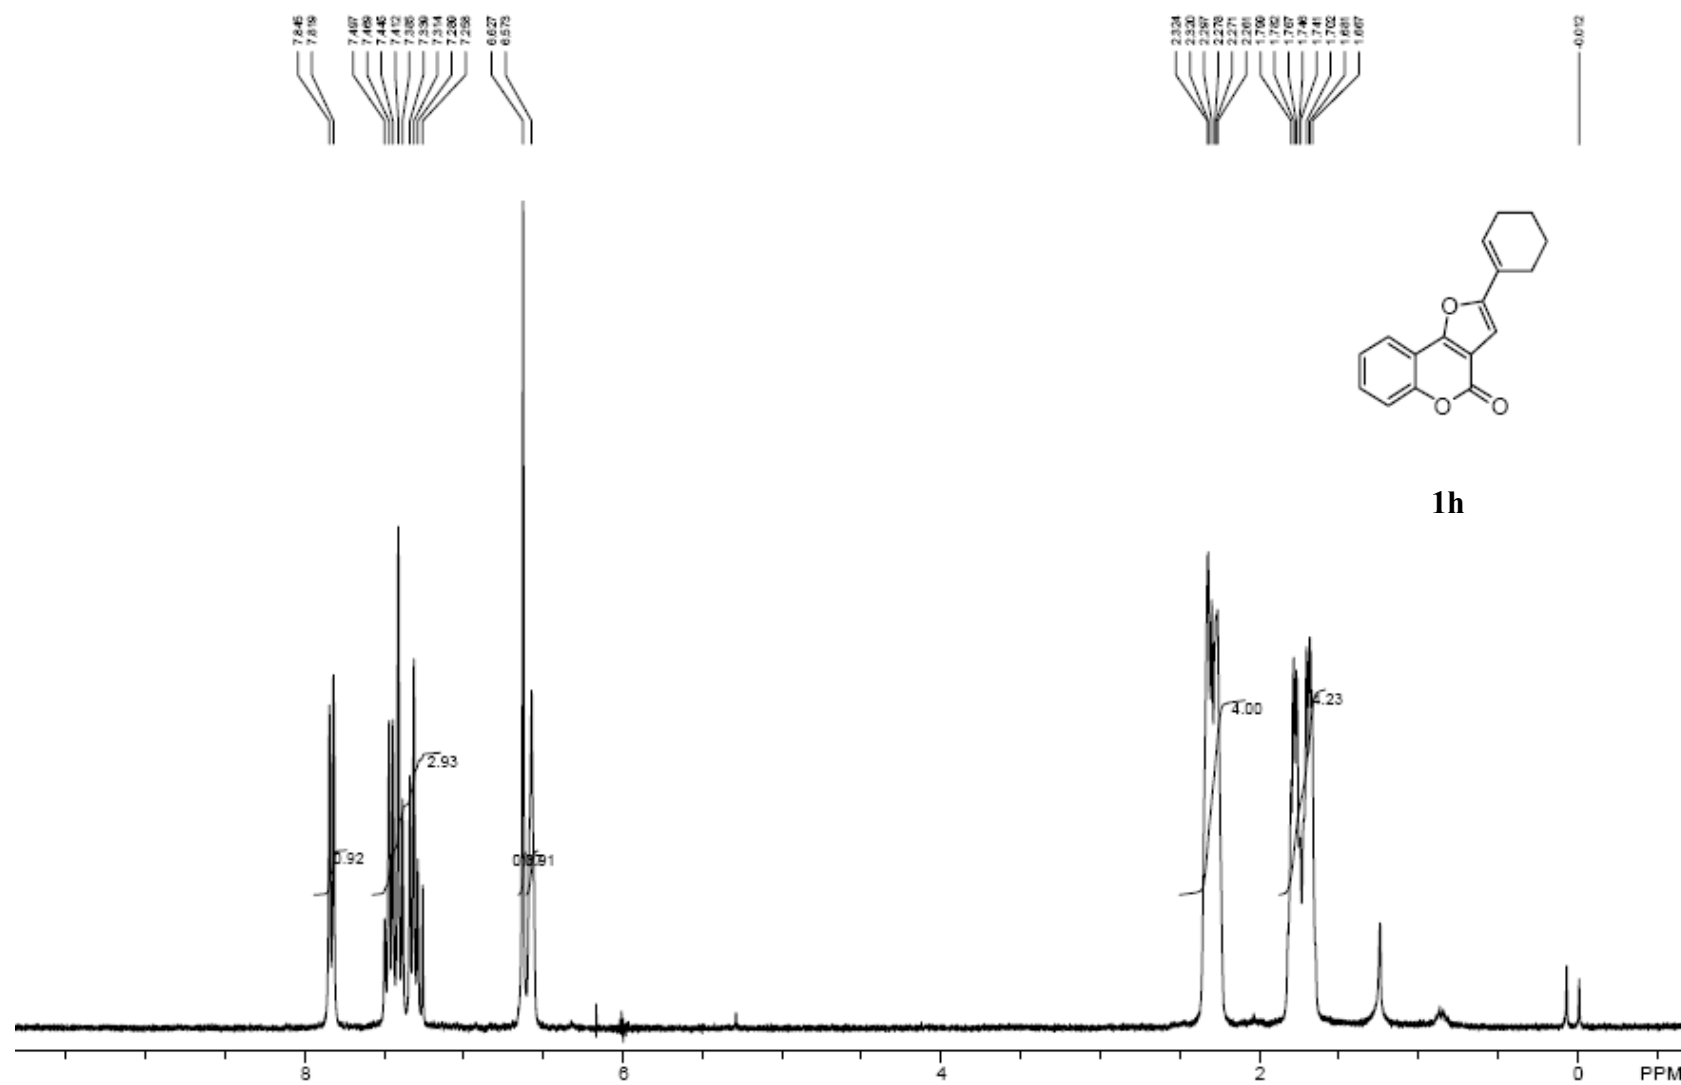

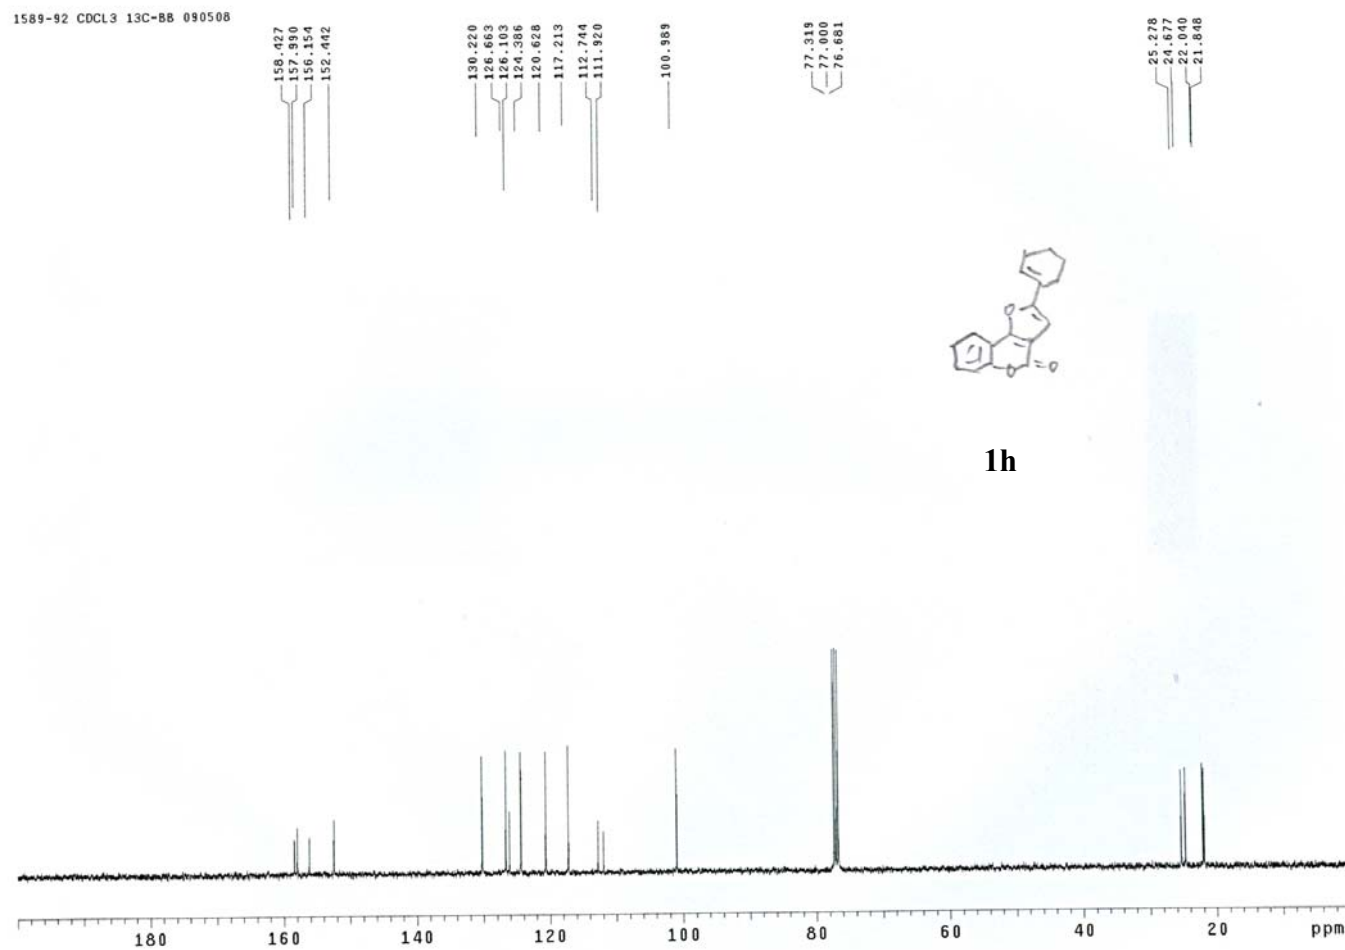

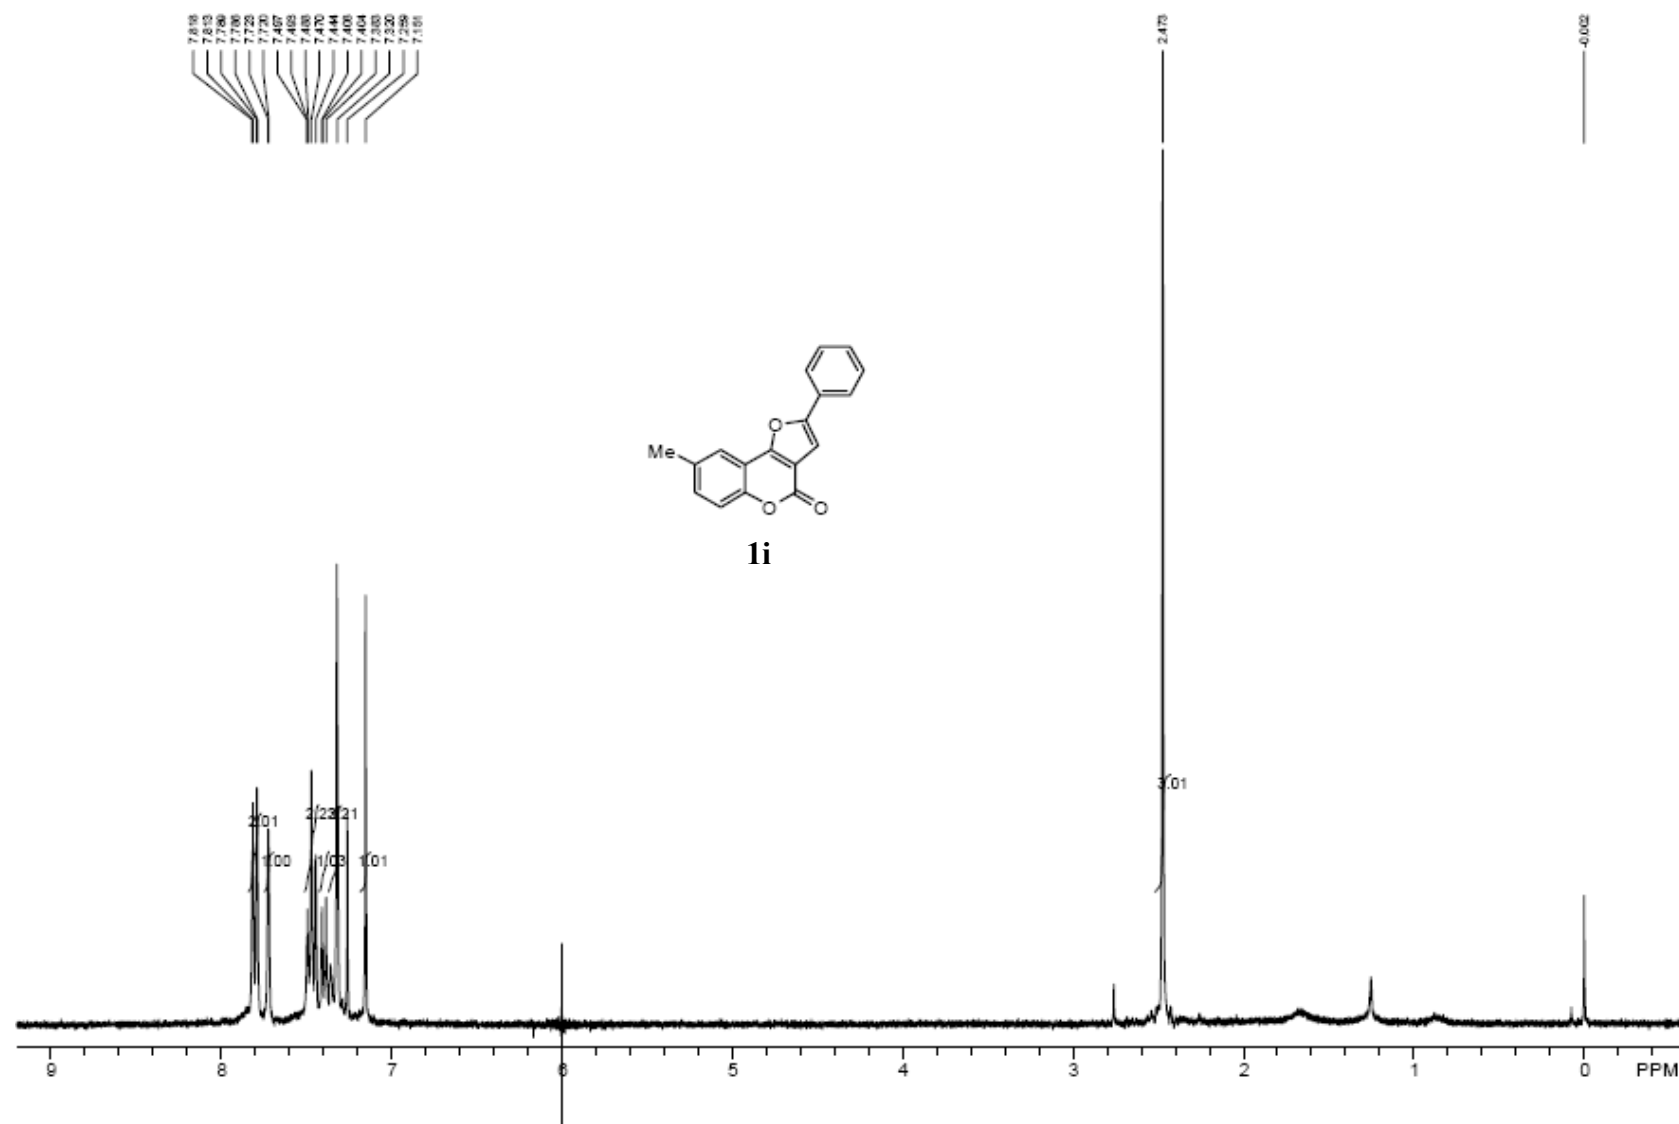

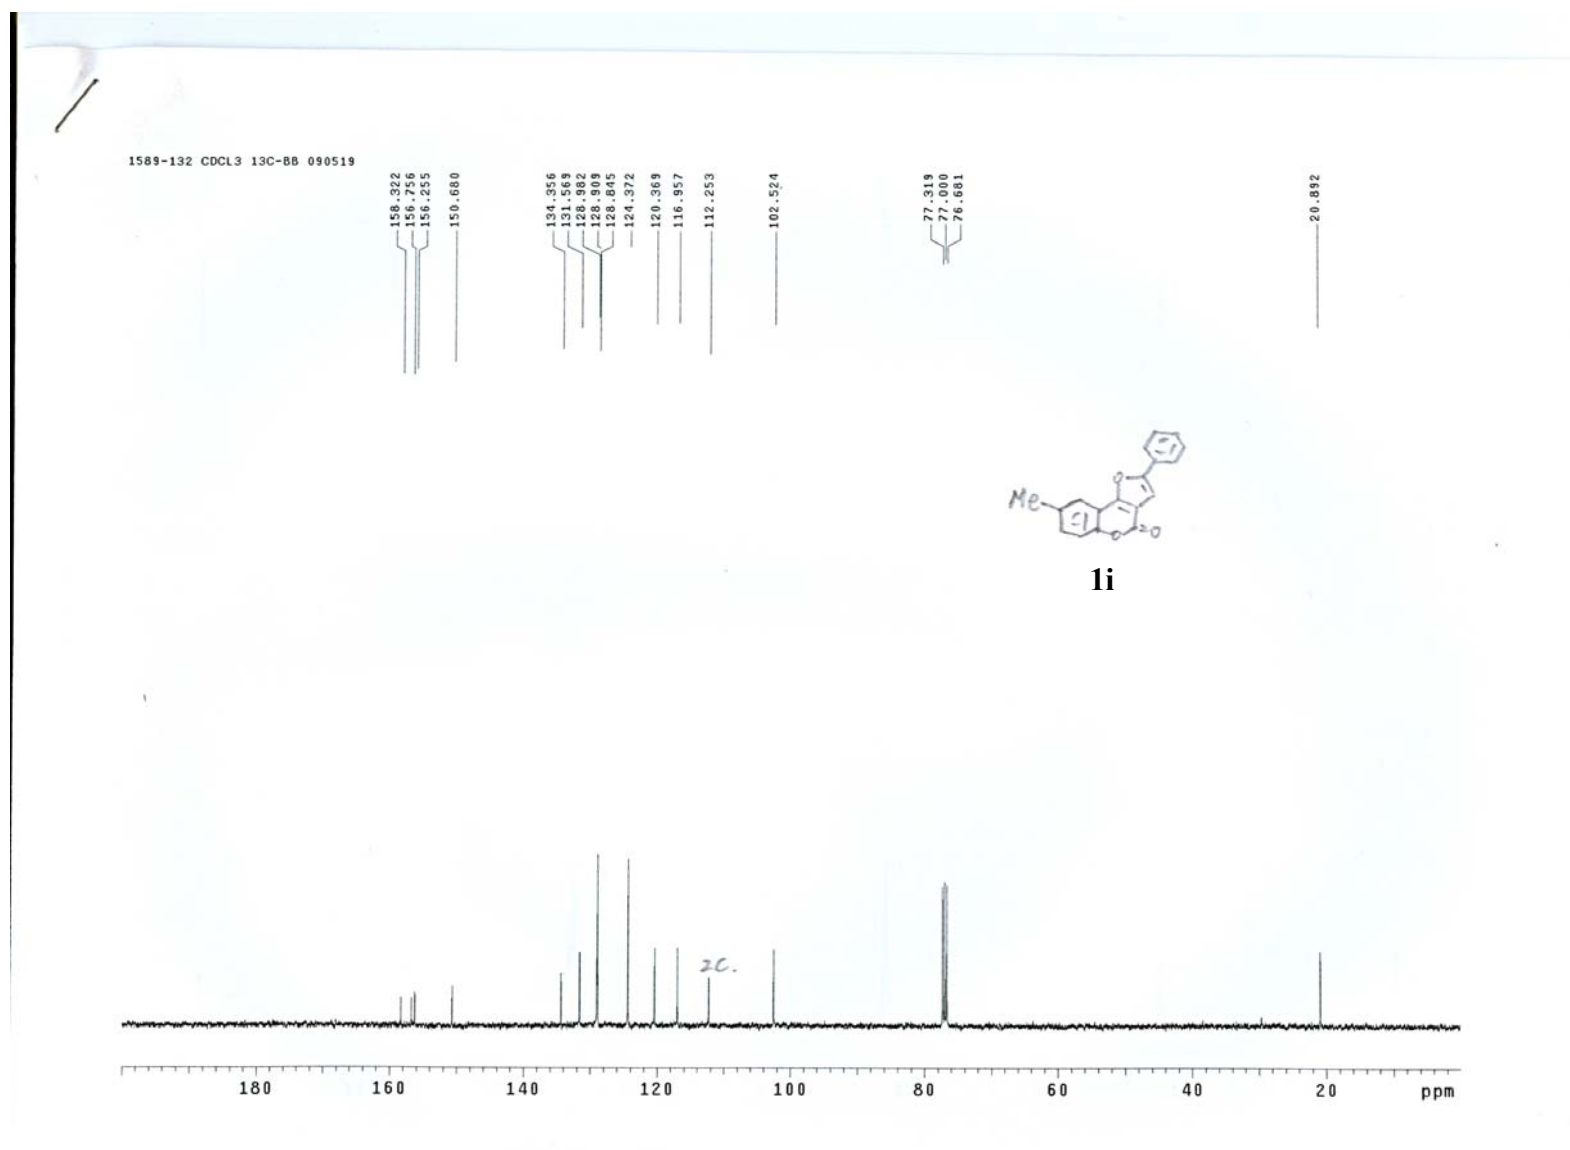

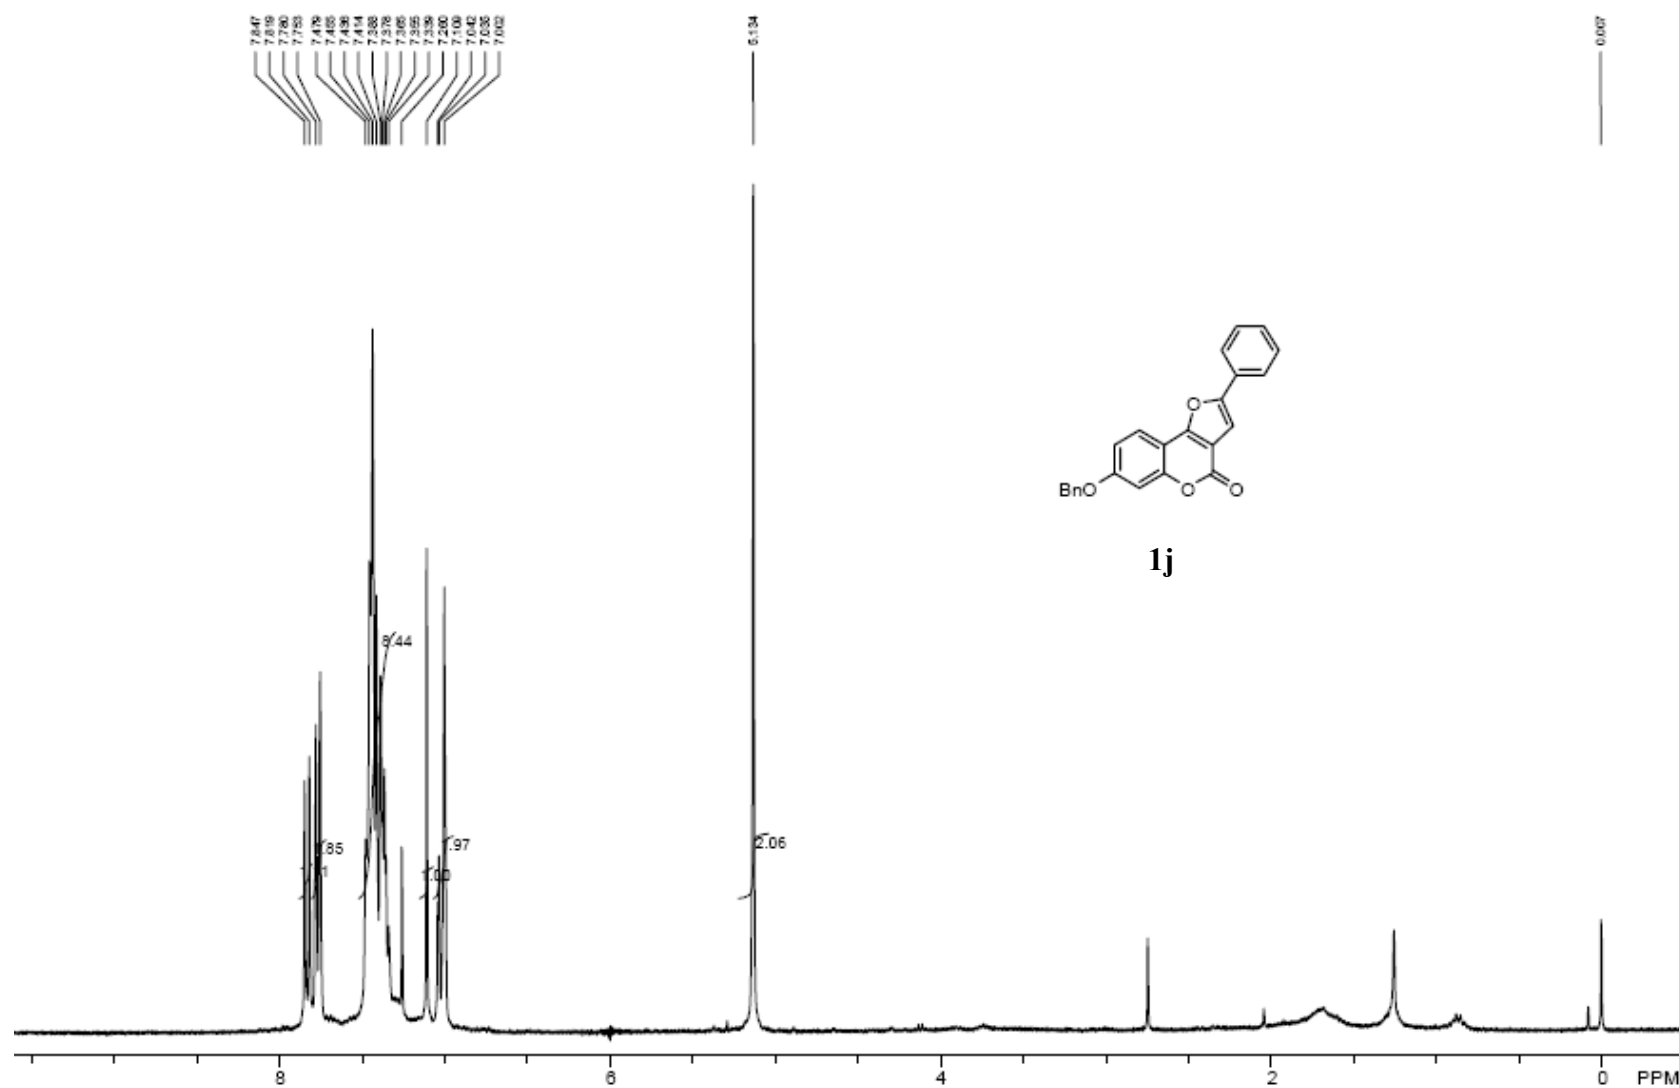

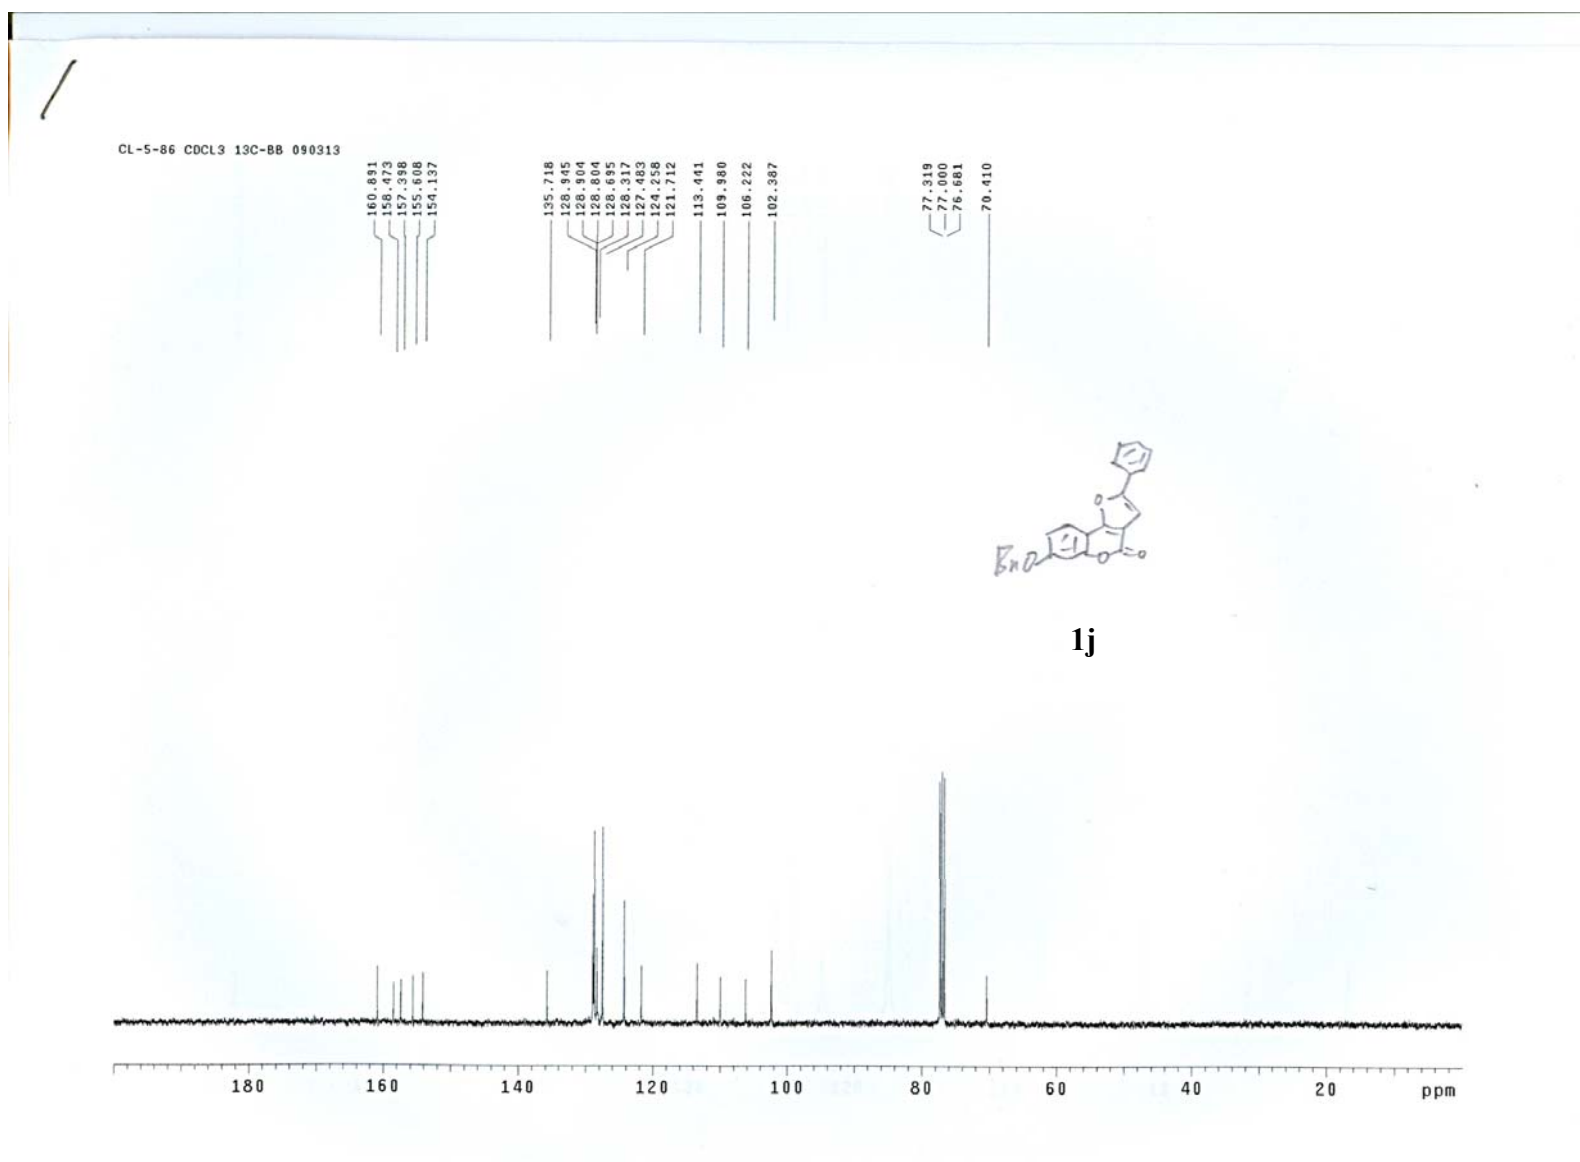

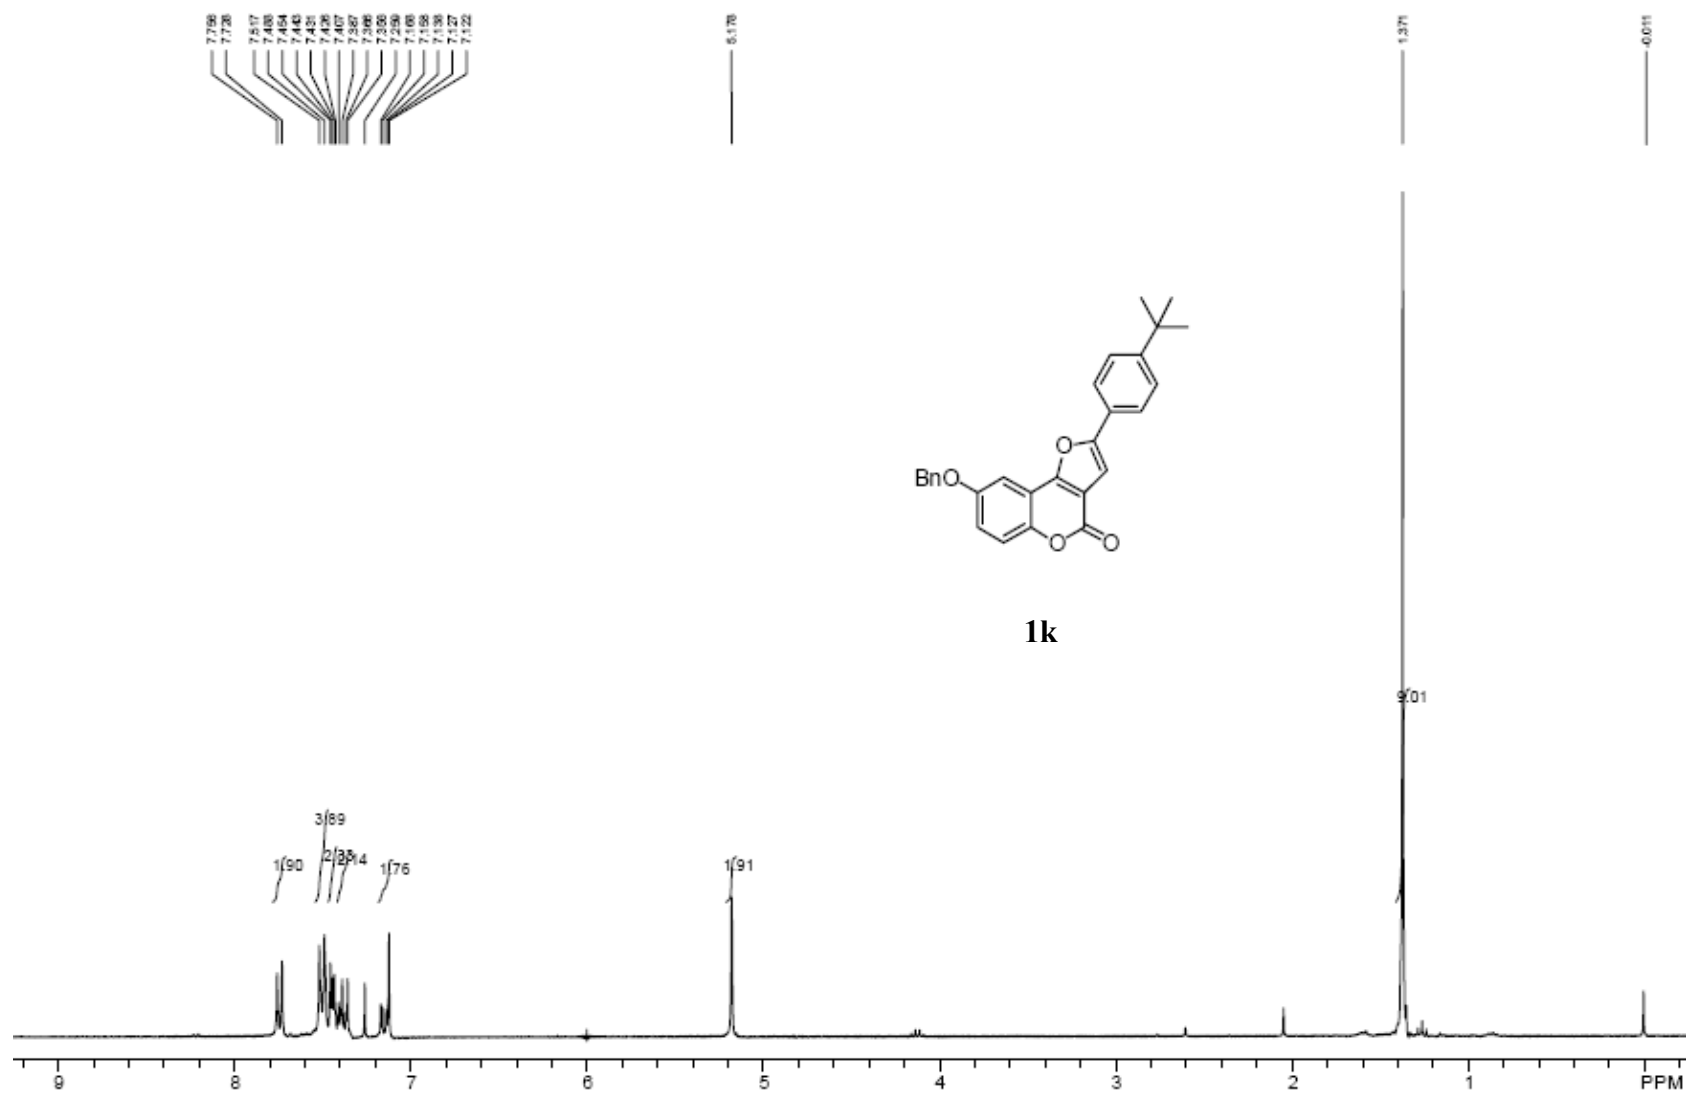

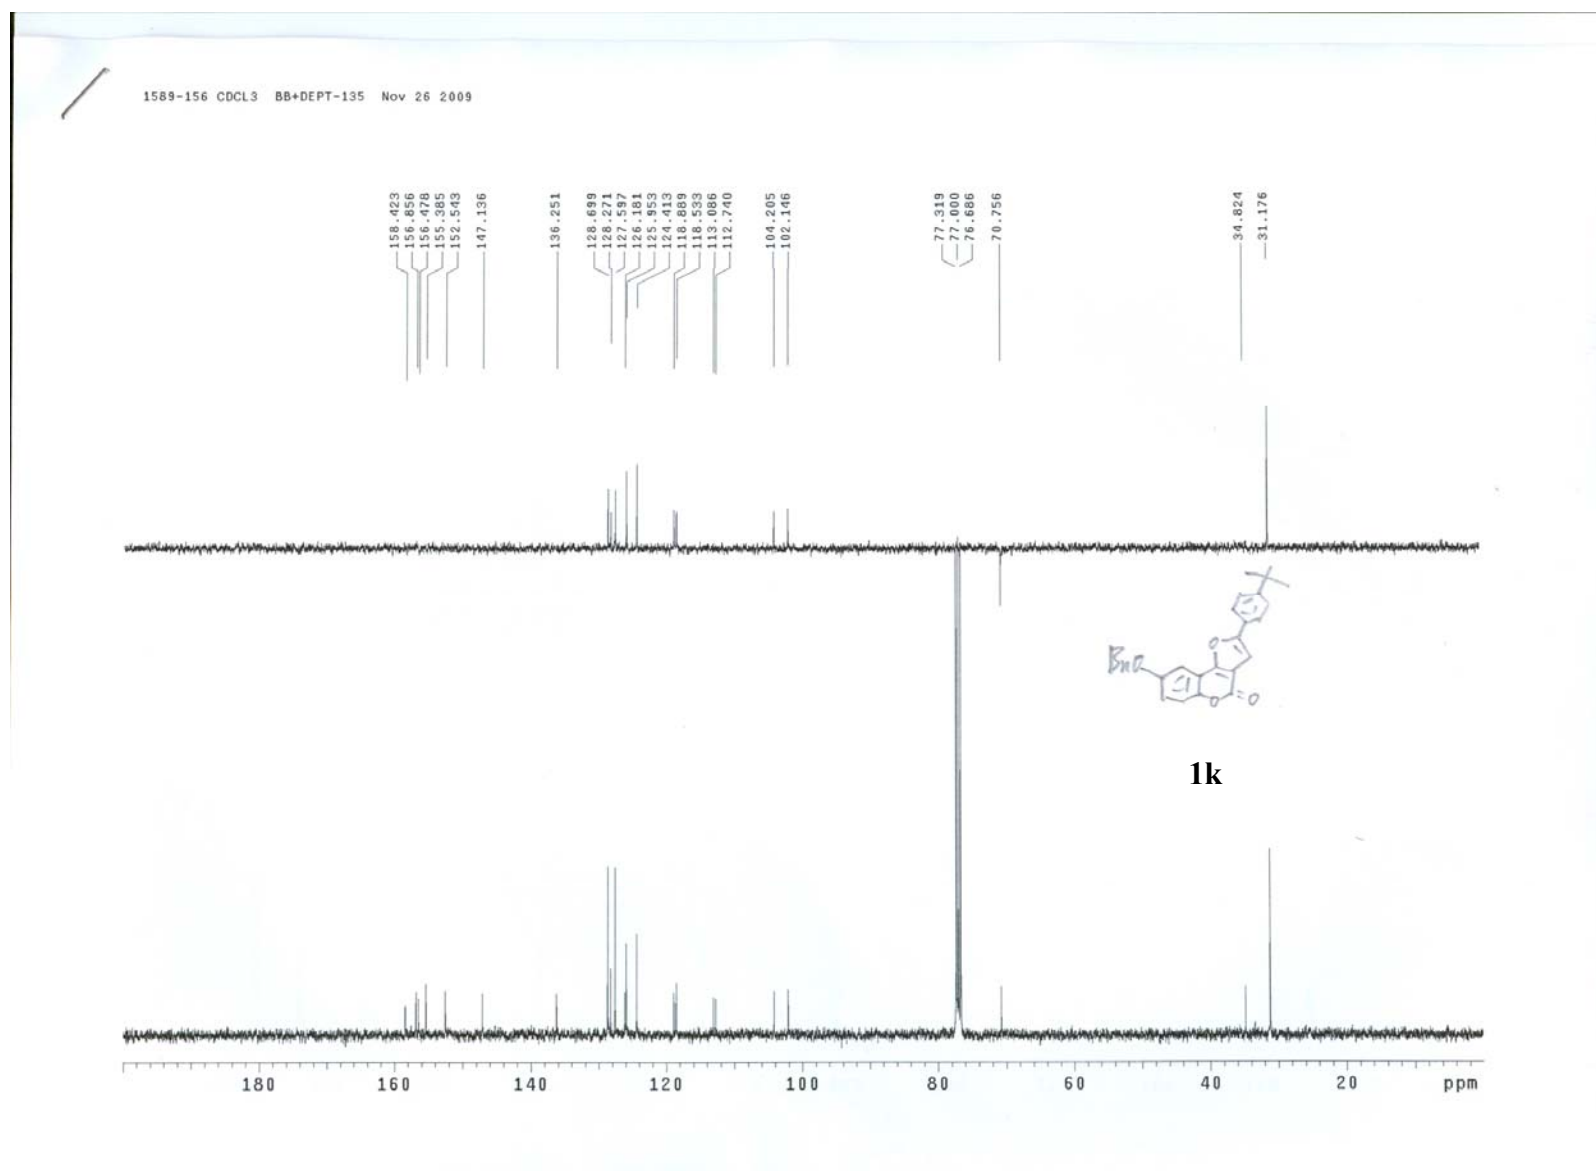

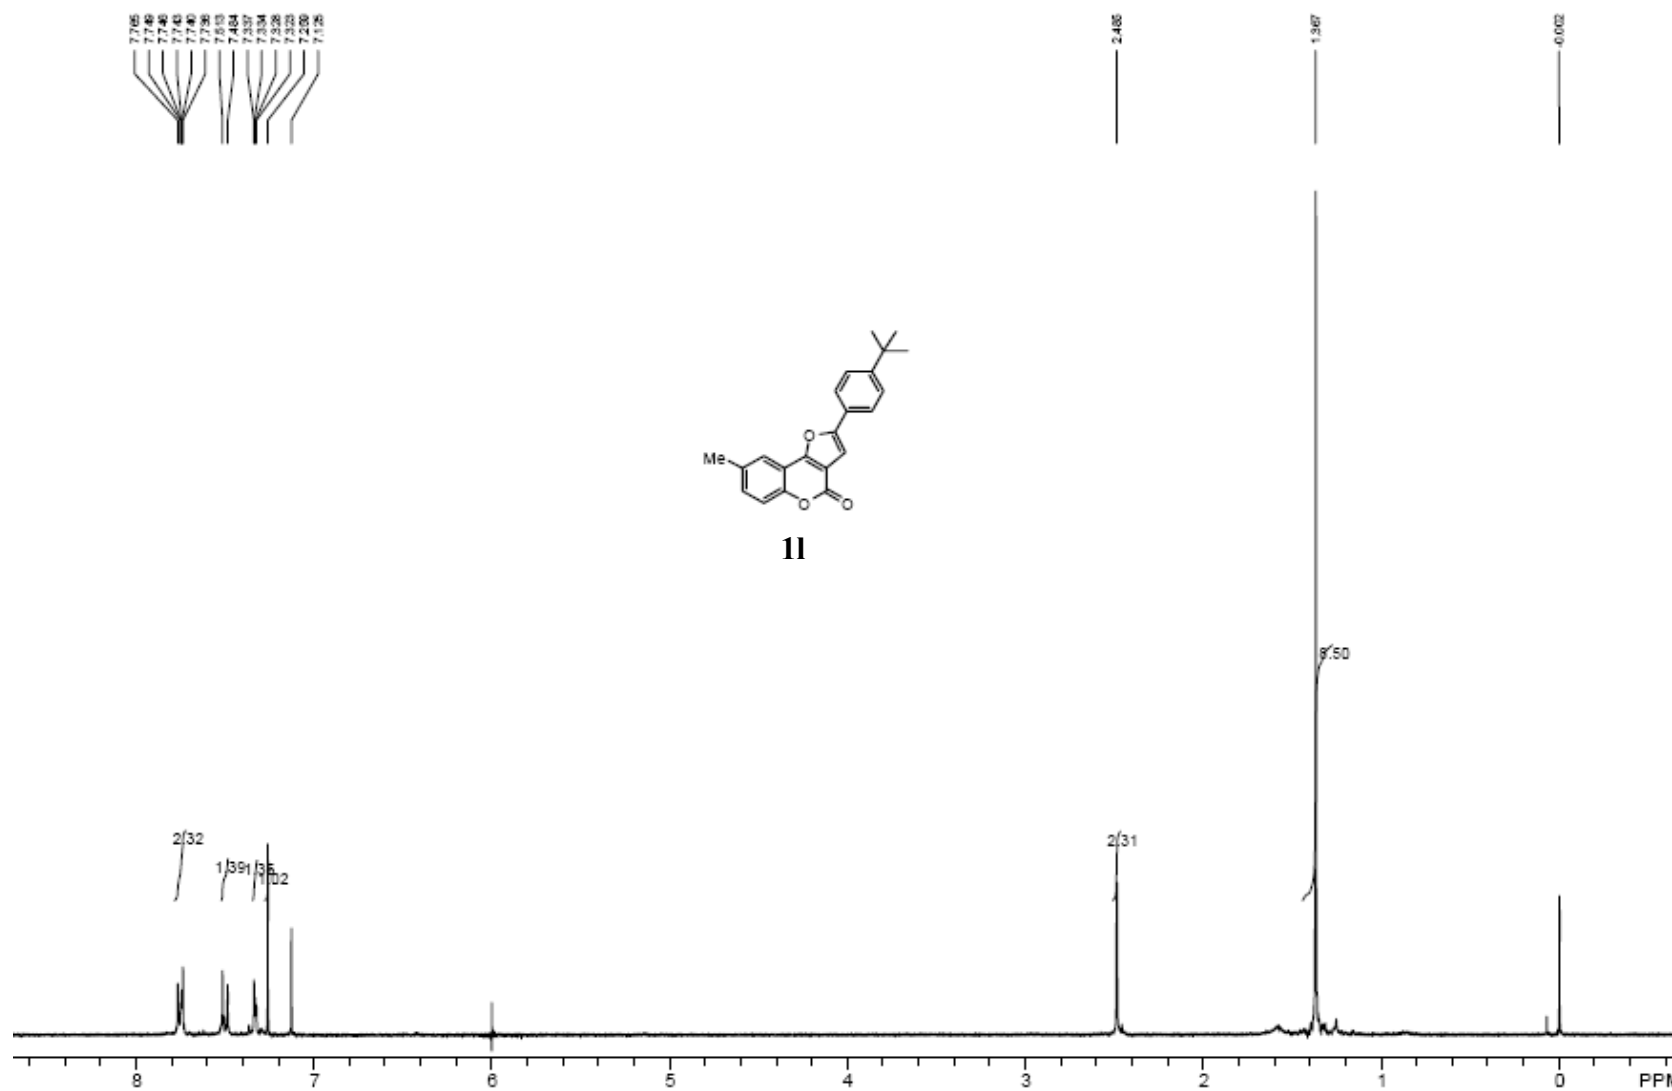

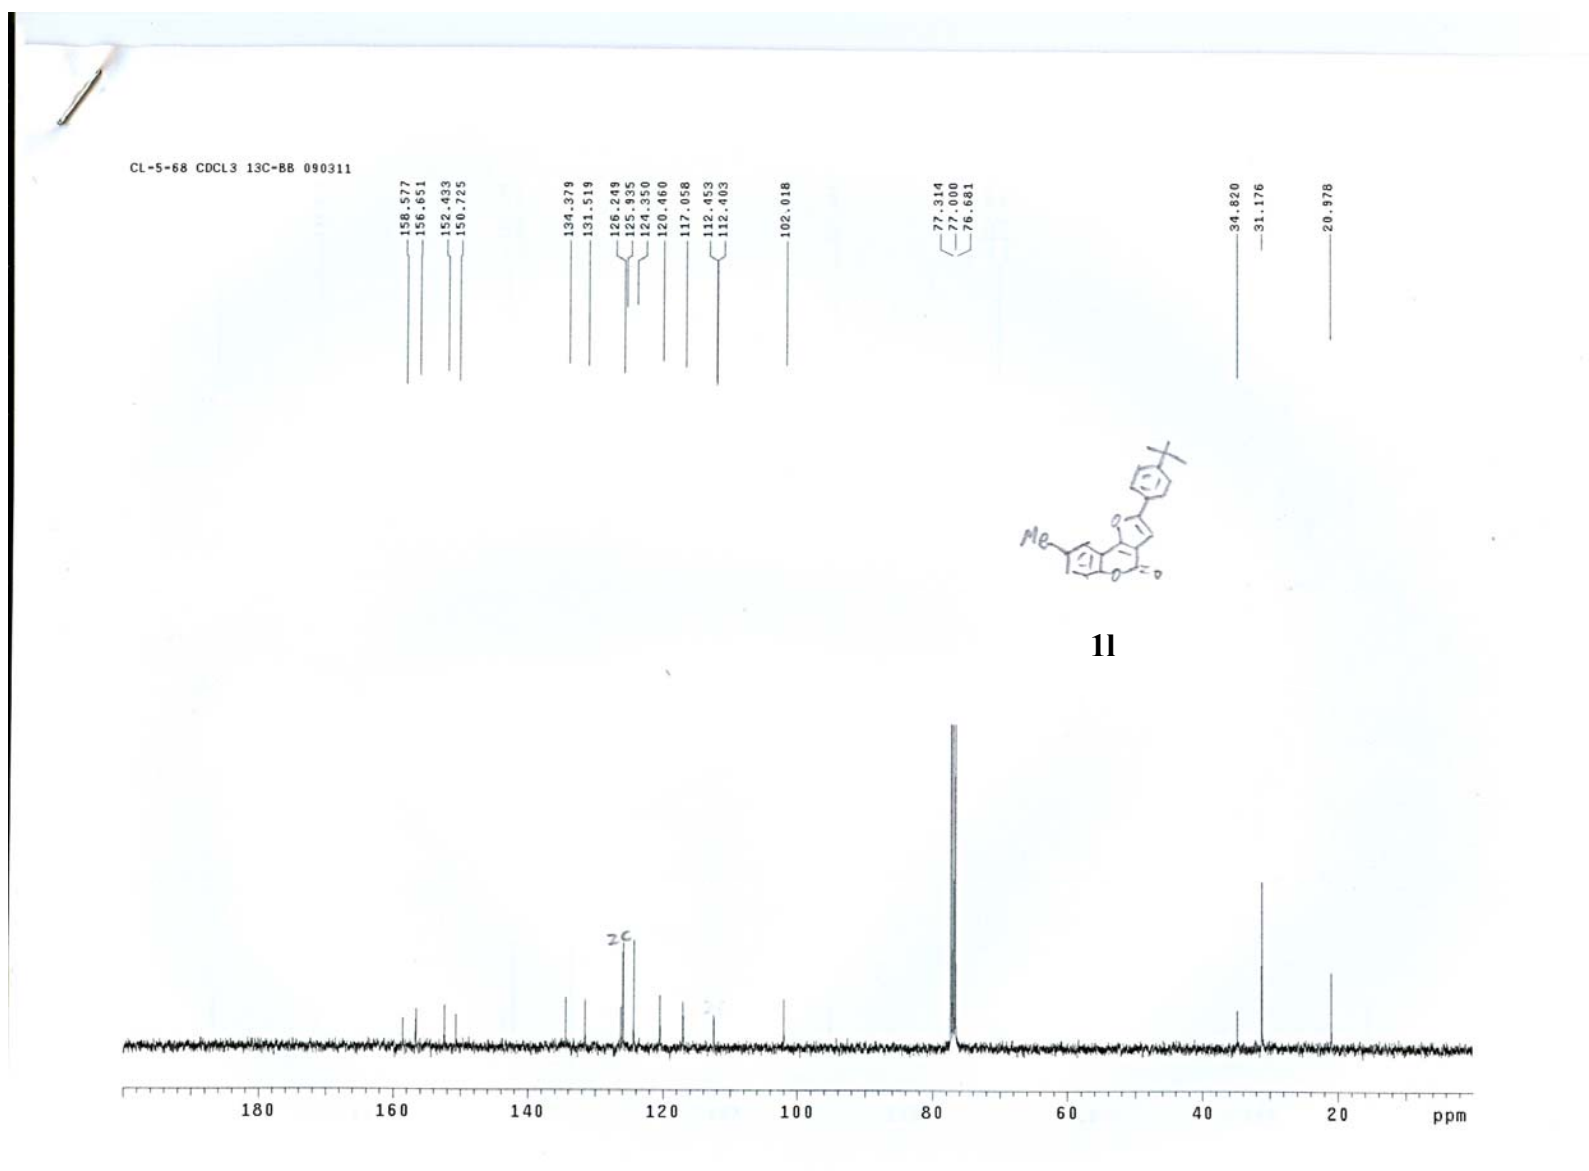

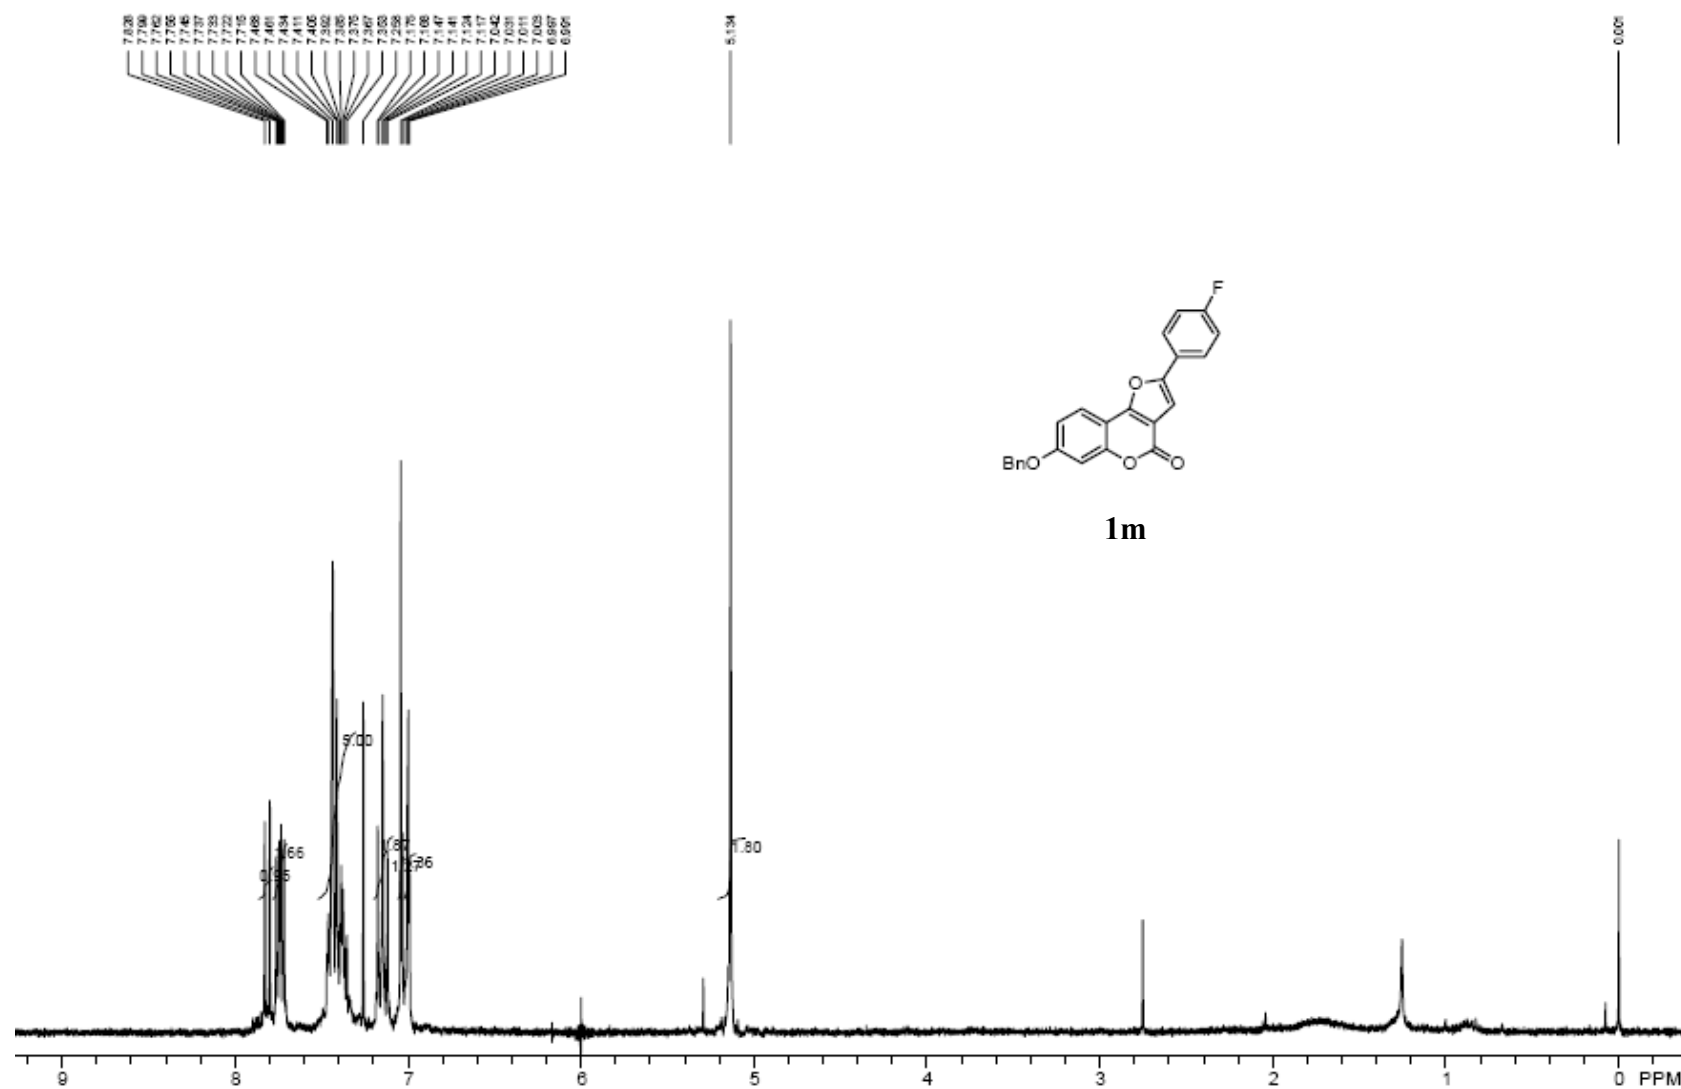

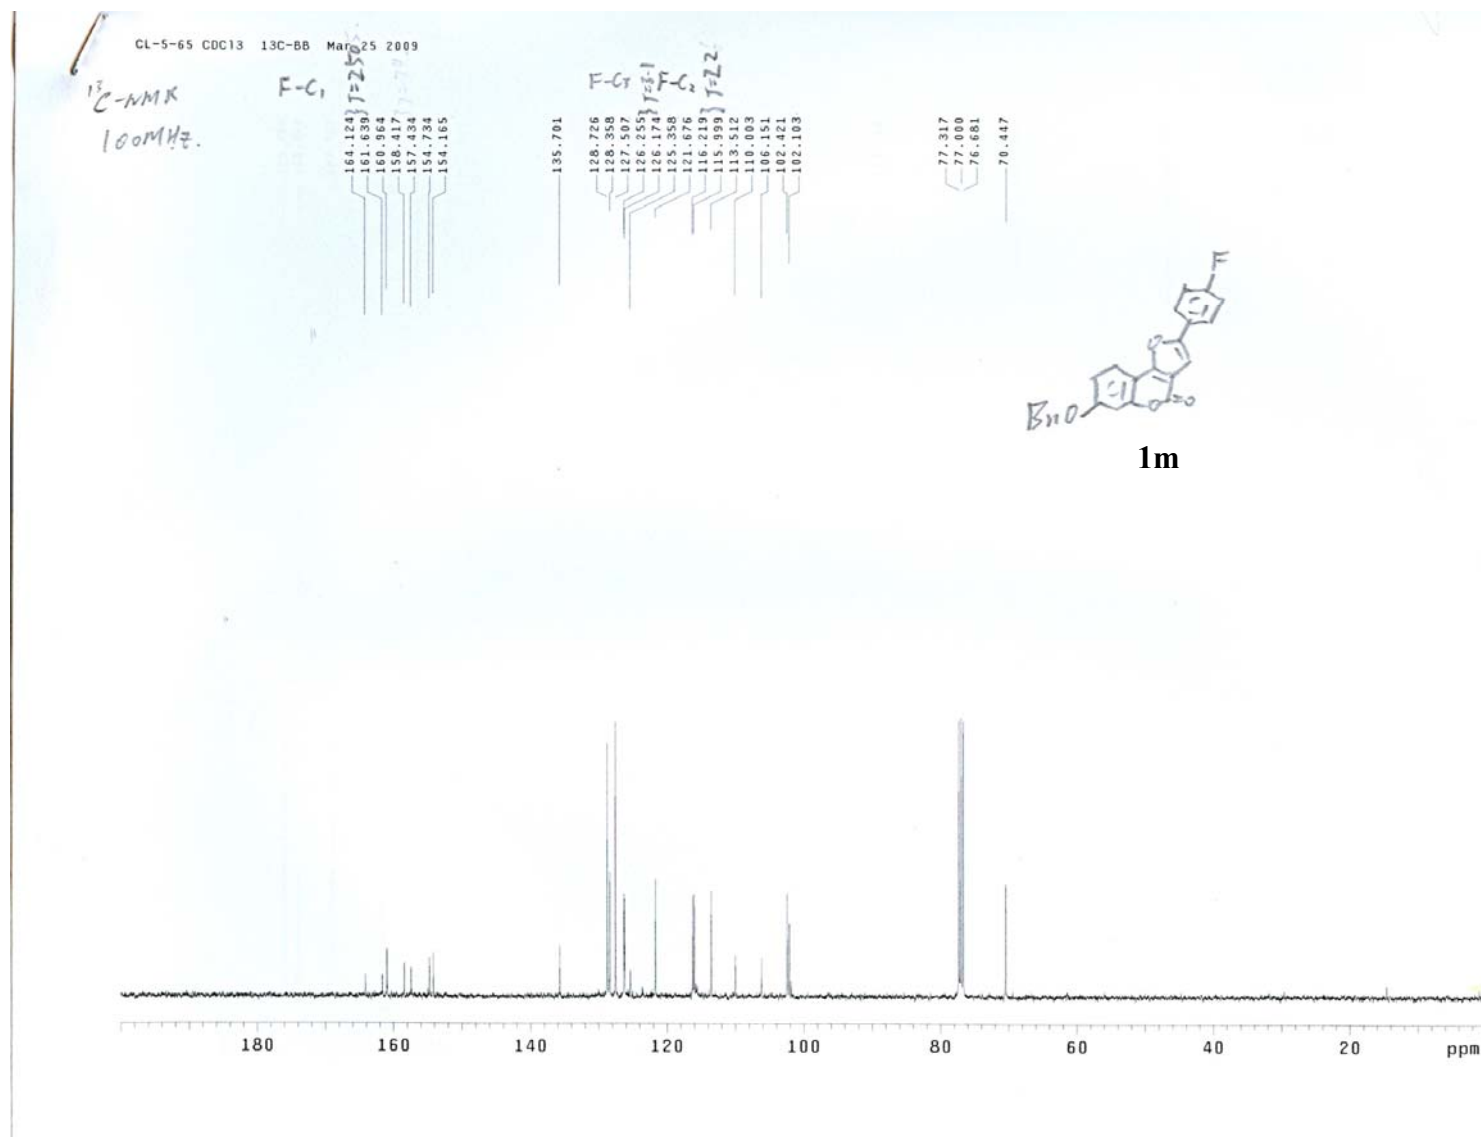

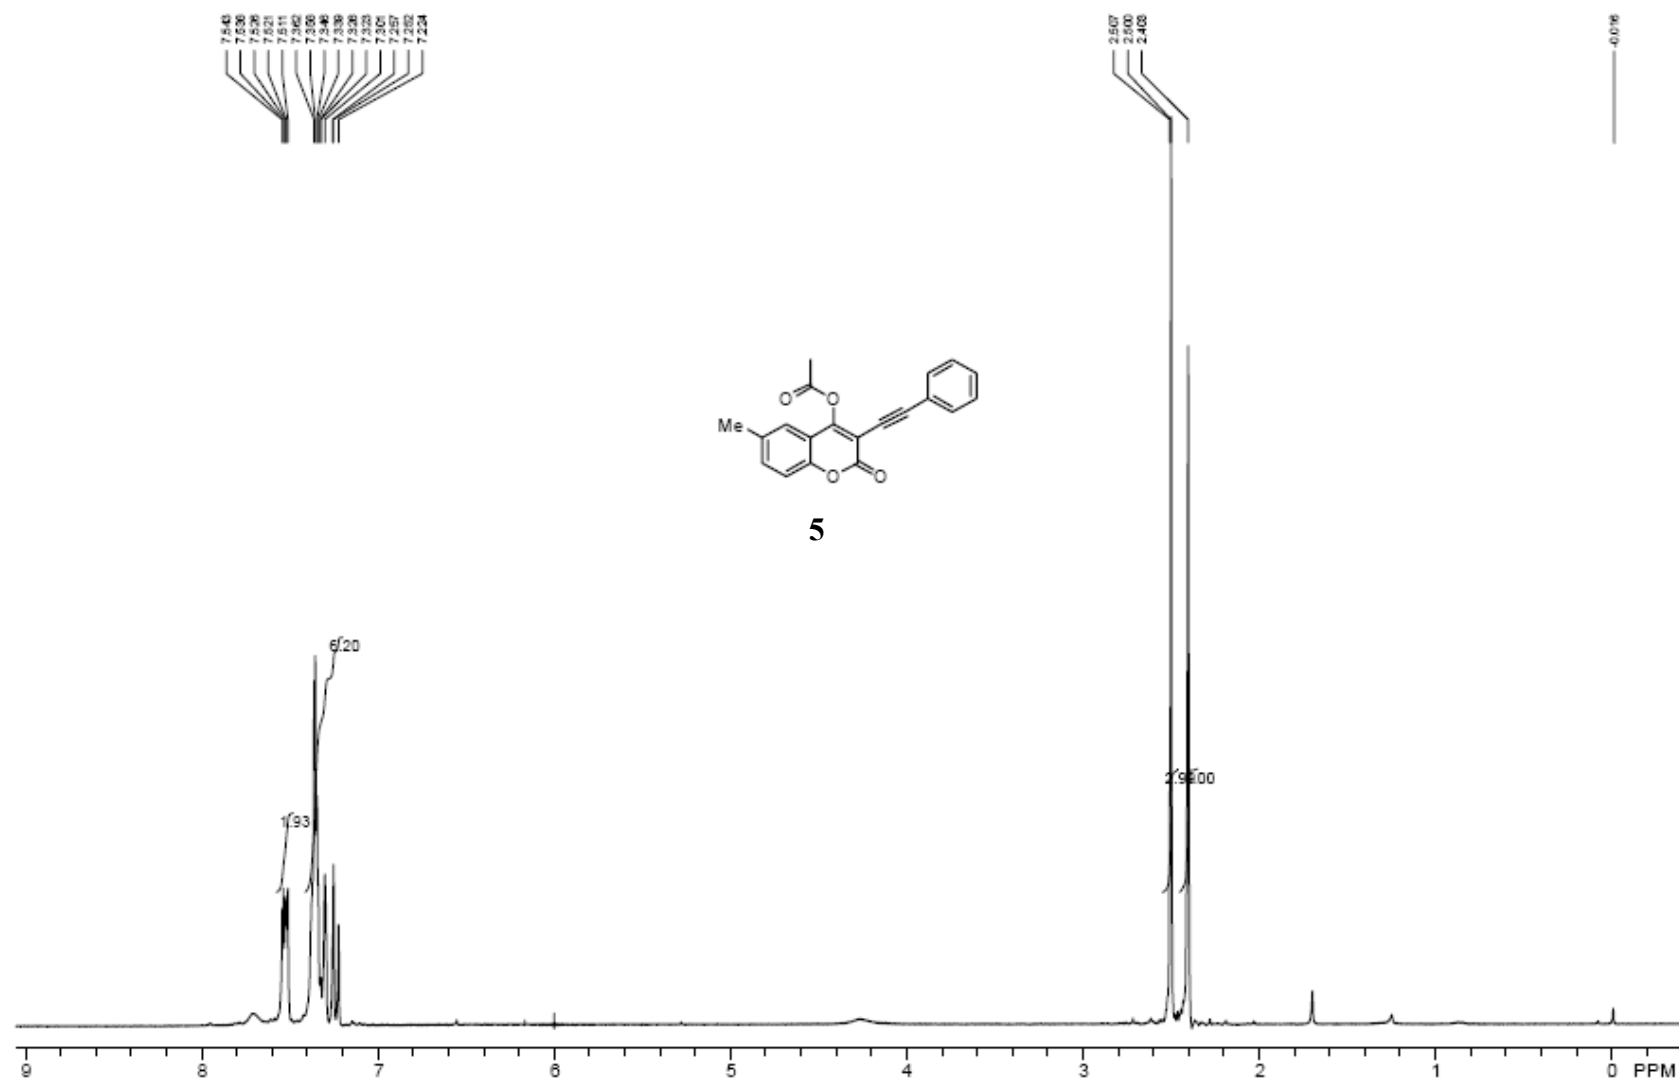

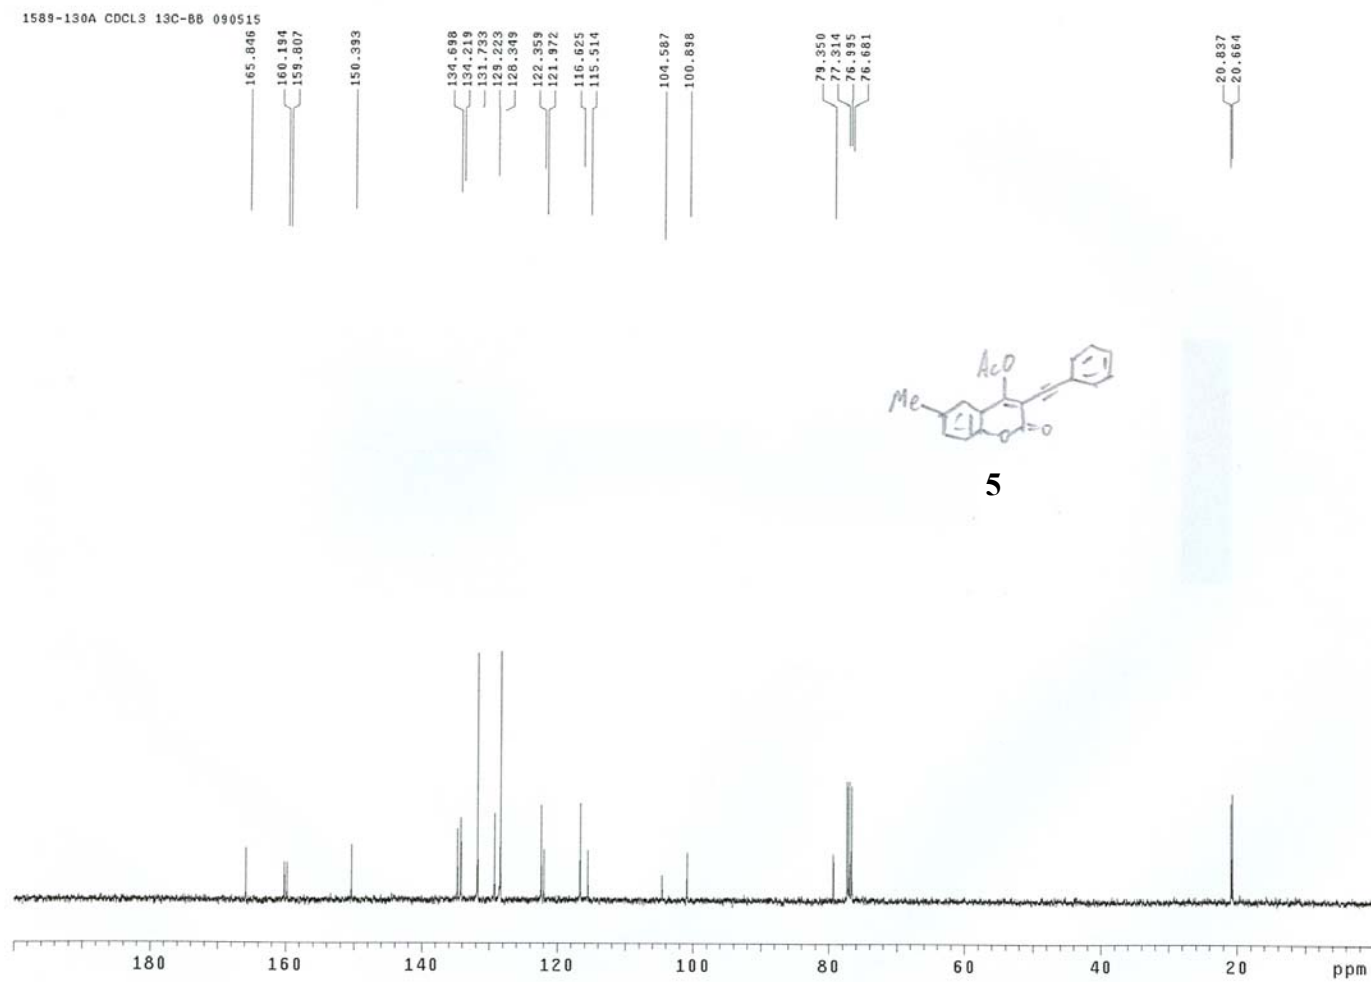

Supplement: c004233a.pdf [file c004233a.pdf]
